# Supplementary material for: Deregulation of the imprinted DLK1-DIO3 locus ncRNAs is associated with replicative senescence of human adipose-derived stem cells
Source: PubMed Central journal article supplement (PMC6218046; doi:10.1371/journal.pone.0206534), 2018-11-05
Supplement: pone.0206534.s005.pdf [file pone.0206534.s005.pdf]

| Probe           | logFC | A     | pvalue | adjpvalue | Location                  |
|-----------------|-------|-------|--------|-----------|---------------------------|
| hsa-miR-32*     | -2,59 | 3,11  | 0,02   | 0,13      | chr9:110848332-110848350  |
| hsa-miR-885-5p  | -2,44 | 2,19  | 0,01   | 0,12      | chr3:010411215-010411230  |
| hsa-miR-766     | -2,27 | 3,63  | 0,02   | 0,12      | chrX:118664754-118664767  |
| hsa-miR-1224-3p | -2,05 | 1,85  | 0,00   | 0,12      | chr3:185441971-185441956  |
| hsa-miR-328     | -2,01 | 3,02  | 0,02   | 0,12      | chr16:065793731-065793747 |
| hsa-miR-483-3p  | -1,98 | 3,09  | 0,01   | 0,12      | chr11:002111948-002111964 |
| hsa-miR-877*    | -1,95 | 2,87  | 0,01   | 0,12      | chr6:030660173-030660161  |
| hsa-miR-1227    | -1,92 | 1,92  | 0,01   | 0,12      | chr19:002185061-002185074 |
| hsa-miR-937     | -1,92 | 1,59  | 0,01   | 0,12      | chr8:144967129-144967144  |
| hsa-miR-647     | -1,82 | 1,56  | 0,01   | 0,12      | chr20:062044488-062044502 |
| hsa-miR-595     | -1,66 | 2,30  | 0,02   | 0,13      | chr7:158018186-158018201  |
| hsa-miR-197     | -1,65 | 6,08  | 0,02   | 0,12      | chr1:109943106-109943091  |
| hsa-miR-1228*   | -1,49 | 1,68  | 0,02   | 0,12      | chr12:055874574-055874563 |
| hsa-miR-19b-1*  | -1,44 | 1,51  | 0,00   | 0,12      | chr13:090801484-090801471 |
| hsa-miR-195*    | -1,23 | 1,25  | 0,01   | 0,12      | chr17:006861671-006861683 |
| hsa-let-7b*     | -1,22 | 2,27  | 0,02   | 0,12      | chr22:044888310-044888296 |
| hsa-miR-491-3p  | -1,15 | 1,81  | 0,04   | 0,19      | chr9:020706174-020706155  |
| hsa-miR-16-2*   | -1,14 | 3,46  | 0,00   | 0,12      | chr3:161605300-161605282  |
| hsa-miR-744*    | -1,10 | 2,04  | 0,00   | 0,12      | chr17:011926029-011926012 |
| hsa-miR-574-3p  | -1,08 | 6,78  | 0,02   | 0,12      | chr4:038546129-038546114  |
| hsa-miR-625*    | -1,05 | 1,62  | 0,00   | 0,12      | chr14:065007645-065007627 |
| hsa-let-7d*     | -1,03 | 1,92  | 0,03   | 0,15      | chr9:095981019-095981002  |
| hsa-miR-34b     | -1,03 | 3,29  | 0,01   | 0,12      | chr11:110888943-110888928 |
| hsa-miR-20a*    | -1,01 | 1,61  | 0,02   | 0,12      | chr13:090801384-090801365 |
| hsa-miR-15b*    | -1,00 | 2,09  | 0,01   | 0,12      | chr3:161605148-161605127  |
| hsa-miR-93*     | -0,89 | 0,85  | 0,00   | 0,12      | chr7:099529336-099529351  |
| hsa-miR-106a    | -0,81 | 3,65  | 0,01   | 0,12      | chrX:133131940-133131952  |
| hsa-miR-550*    | -0,80 | 2,68  | 0,01   | 0,12      | chr7:030296016-030296001  |
| hsa-miR-17      | -0,79 | 7,21  | 0,02   | 0,14      | chr13:090800895-090800881 |
| hsa-miR-20b     | -0,79 | 6,06  | 0,01   | 0,12      | chrX:133131546-133131564  |
| hsa-miR-20a     | -0,79 | 7,98  | 0,02   | 0,13      | chr13:090801349-090801332 |
| hsa-miR-92a     | -0,76 | 7,05  | 0,01   | 0,12      | chr13:090801637-090801623 |
| hsa-miR-25      | -0,76 | 7,45  | 0,02   | 0,12      | chr7:099529130-099529146  |
| hsa-miR-93      | -0,74 | 7,41  | 0,03   | 0,16      | chr7:099529374-099529389  |
| hsa-miR-7-1*    | -0,73 | 2,99  | 0,02   | 0,13      | chr9:085774506-085774524  |
| hsa-miR-374b*   | -0,72 | 1,12  | 0,01   | 0,12      | chrX:073355117-073355138  |
| hsa-miR-30b*    | -0,71 | 1,79  | 0,01   | 0,12      | chr8:135881957-135881975  |
| hsa-miR-671-3p  | -0,71 | 0,47  | 0,01   | 0,12      | chr7:150566527-150566518  |
| hsa-miR-16      | -0,70 | 10,51 | 0,01   | 0,12      | chr13:049521164-049521181 |
| hsa-miR-629     | -0,68 | 1,67  | 0,03   | 0,16      | chr15:068158820-068158834 |
| hsa-miR-15b     | -0,67 | 9,48  | 0,03   | 0,15      | chr3:161605110-161605091  |
| hsa-miR-15a     | -0,64 | 8,42  | 0,02   | 0,13      | chr13:049521304-049521324 |
| hsa-miR-221     | 0,49  | 10,85 | 0,02   | 0,14      | chrX:045490552-045490570  |
| hsa-miR-654-3p  | 0,54  | 7,03  | 0,03   | 0,15      | chr14:100576380-100576363 |
| hsa-miR-181a    | 0,55  | 5,89  | 0,01   | 0,12      | chr1:197094860-197094873  |
| hsa-miR-379     | 0,55  | 6,28  | 0,03   | 0,15      | chr14:100558181-100558167 |
| hsa-miR-152     | 0,55  | 7,11  | 0,03   | 0,15      | chr17:043469539-043469554 |
| hsa-miR-487b    | 0,56  | 6,97  | 0,02   | 0,14      | chr14:100582616-100582599 |
| hsa-miR-154*    | 0,56  | 6,21  | 0,03   | 0,15      | chr14:100595916-100595897 |
| hsa-miR-411     | 0,58  | 5,54  | 0,02   | 0,13      | chr14:100559450-100559433 |
| hsa-miR-665     | 0,59  | 1,97  | 0,04   | 0,18      | chr14:100411184-100411172 |
| hsa-miR-24-1*   | 0,61  | 3,16  | 0,03   | 0,15      | chr9:096888151-096888131  |
| hsa-miR-377*    | 0,61  | 2,63  | 0,02   | 0,12      | chr14:100598167-100598149 |
| hsa-miR-376c    | 0,65  | 8,57  | 0,01   | 0,12      | chr14:100575842-100575824 |
| hsa-miR-543     | 0,66  | 5,53  | 0,01   | 0,12      | chr14:100568144-100568126 |
| hsa-miR-493*    | 0,67  | 6,94  | 0,01   | 0,12      | chr14:100405186-100405168 |

|                 |      |      |      |      |                           |
|-----------------|------|------|------|------|---------------------------|
| hsa-miR-601     | 0,67 | 1,91 | 0,01 | 0,12 | chr9:125204667-125204682  |
| hsa-miR-432     | 0,69 | 5,20 | 0,00 | 0,12 | chr14:100420608-100420591 |
| hsa-miR-337-3p  | 0,70 | 5,43 | 0,01 | 0,12 | chr14:100410664-100410644 |
| hsa-miR-370     | 0,70 | 4,50 | 0,01 | 0,12 | chr14:100447297-100447284 |
| hsa-miR-409-3p  | 0,71 | 6,96 | 0,01 | 0,12 | chr14:100601457-100601443 |
| hsa-miR-377     | 0,71 | 8,22 | 0,01 | 0,12 | chr14:100598205-100598187 |
| hsa-miR-193a-3p | 0,72 | 8,19 | 0,01 | 0,12 | chr17:026911203-026911187 |
| hsa-miR-149*    | 0,73 | 0,77 | 0,01 | 0,12 | chr2:241044166-241044154  |
| hsa-miR-410     | 0,73 | 5,66 | 0,01 | 0,12 | chr14:100602071-100602053 |
| hsa-miR-127-3p  | 0,74 | 7,81 | 0,02 | 0,14 | chr14:100419146-100419129 |
| hsa-miR-498     | 0,75 | 1,70 | 0,02 | 0,12 | chr19:058869318-058869303 |
| hsa-miR-34a     | 0,77 | 9,28 | 0,03 | 0,15 | chr1:009134381-009134399  |
| hsa-miR-654-5p  | 0,78 | 2,93 | 0,02 | 0,12 | chr14:100576345-100576329 |
| hsa-miR-376a    | 0,78 | 8,48 | 0,01 | 0,12 | chr14:100576228-100576211 |
| hsa-miR-134     | 0,78 | 5,28 | 0,03 | 0,15 | chr14:100590805-100590794 |
| hsa-miR-409-5p  | 0,79 | 4,57 | 0,00 | 0,12 | chr14:100601426-100601410 |
| hsa-miR-369-5p  | 0,79 | 4,69 | 0,01 | 0,12 | chr14:100601717-100601698 |
| hsa-miR-369-3p  | 0,79 | 2,84 | 0,00 | 0,12 | chr14:100601751-100601731 |
| hsa-miR-136*    | 0,82 | 5,57 | 0,00 | 0,12 | chr14:100420861-100420842 |
| hsa-miR-495     | 0,83 | 6,69 | 0,00 | 0,12 | chr14:100569915-100569896 |
| hsa-miR-154     | 0,84 | 5,38 | 0,01 | 0,12 | chr14:100595880-100595863 |
| hsa-miR-373*    | 0,87 | 1,61 | 0,04 | 0,19 | chr19:058983797-058983785 |
| hsa-miR-337-5p  | 0,88 | 6,63 | 0,00 | 0,12 | chr14:100410625-100410609 |
| hsa-miR-663     | 0,92 | 3,34 | 0,01 | 0,12 | chr20:026136879-026136891 |
| hsa-miR-1225-5p | 0,95 | 6,78 | 0,03 | 0,15 | chr16:002080265-002080274 |
| hsa-miR-376a*   | 1,00 | 5,28 | 0,00 | 0,12 | chr14:100576899-100576879 |
| hsa-miR-136     | 1,22 | 7,17 | 0,00 | 0,06 | chr14:100420828-100420806 |
| hsa-miR-126     | 1,23 | 2,37 | 0,01 | 0,12 | chr9:138684947-138684931  |
