# Supplementary material for: Deregulation of the imprinted DLK1-DIO3 locus ncRNAs is associated with replicative senescence of human adipose-derived stem cells
Source: PubMed Central journal article supplement (PMC6218046; doi:10.1371/journal.pone.0206534), 2018-11-05
Supplement: pone.0206534.s006.pdf [file pone.0206534.s006.pdf]

| miRNum | Target  | miRNA                                                                                                                                         |
|--------|---------|-----------------------------------------------------------------------------------------------------------------------------------------------|
| 9      | WEE1    | hsa-miR-106a-5p hsa-miR-15a-5p hsa-miR-15b-3p hsa-miR-15b-5p<br>hsa-miR-16-5p hsa-miR-20a-5p hsa-miR-221-3p hsa-miR-374b-3p<br>hsa-miR-877-3p |
| 8      | BTG2    | hsa-miR-15a-5p hsa-miR-15b-5p hsa-miR-16-5p hsa-miR-17-3p hsa-<br>miR-20a-5p hsa-miR-25-3p hsa-miR-34b-5p hsa-miR-92a-3p                      |
| 8      | NUCKS1  | hsa-miR-15a-5p hsa-miR-15b-5p hsa-miR-16-2-3p hsa-miR-16-5p<br>hsa-miR-25-3p hsa-miR-877-3p hsa-miR-92a-3p hsa-miR-93-3p                      |
| 8      | NUFIP2  | hsa-miR-106a-5p hsa-miR-15a-5p hsa-miR-15b-5p hsa-miR-16-5p<br>hsa-miR-193a-3p hsa-miR-20a-5p hsa-miR-25-3p hsa-miR-92a-3p                    |
| 7      | E2F3    | hsa-miR-15a-5p hsa-miR-15b-5p hsa-miR-16-5p hsa-miR-17-5p hsa-<br>miR-20a-5p hsa-miR-34a-5p hsa-miR-92a-3p                                    |
| 7      | HBP1    | hsa-let-7b-3p hsa-miR-106a-5p hsa-miR-17-3p hsa-miR-17-5p hsa-<br>miR-20a-5p hsa-miR-20b-5p hsa-miR-766-5p                                    |
| 7      | KLHL15  | hsa-miR-15a-5p hsa-miR-15b-5p hsa-miR-16-2-3p hsa-miR-16-5p<br>hsa-miR-20a-5p hsa-miR-25-3p hsa-miR-92a-3p                                    |
| 6      | CCND1   | hsa-miR-106a-5p hsa-miR-15a-5p hsa-miR-15b-5p hsa-miR-16-5p<br>hsa-miR-20a-5p hsa-miR-34a-5p                                                  |
| 6      | DDX3X   | hsa-miR-106a-3p hsa-miR-15a-5p hsa-miR-15b-5p hsa-miR-16-5p<br>hsa-miR-25-3p hsa-miR-92a-3p                                                   |
| 6      | EIF4G2  | hsa-miR-106a-5p hsa-miR-17-5p hsa-miR-20a-5p hsa-miR-20b-5p<br>hsa-miR-25-3p hsa-miR-92a-3p                                                   |
| 6      | MIDN    | hsa-miR-106a-5p hsa-miR-17-5p hsa-miR-20a-5p hsa-miR-20b-5p<br>hsa-miR-221-3p hsa-miR-766-5p                                                  |
| 6      | MYLIP   | hsa-miR-106a-5p hsa-miR-20a-5p hsa-miR-20b-5p hsa-miR-221-3p<br>hsa-miR-25-3p hsa-miR-92a-3p                                                  |
| 6      | PTEN    | hsa-miR-17-5p hsa-miR-20a-5p hsa-miR-20b-5p hsa-miR-221-3p<br>hsa-miR-543 hsa-miR-92a-3p                                                      |
| 6      | SIK1    | hsa-miR-106a-5p hsa-miR-15a-5p hsa-miR-15b-5p hsa-miR-16-5p<br>hsa-miR-20a-5p hsa-miR-92a-3p                                                  |
| 6      | SKI     | hsa-miR-15a-5p hsa-miR-15b-5p hsa-miR-16-5p hsa-miR-20a-5p<br>hsa-miR-374b-3p hsa-miR-92a-3p                                                  |
| 6      | SMAD7   | hsa-miR-15a-5p hsa-miR-15b-5p hsa-miR-16-5p hsa-miR-25-3p hsa-<br>miR-374b-3p hsa-miR-766-5p                                                  |
| 6      | SRPR    | hsa-miR-15a-5p hsa-miR-15b-5p hsa-miR-16-5p hsa-miR-25-3p hsa-<br>miR-374b-3p hsa-miR-92a-3p                                                  |
| 6      | ZBTB5   | hsa-miR-106a-5p hsa-miR-15a-5p hsa-miR-15b-5p hsa-miR-16-5p<br>hsa-miR-20a-5p hsa-miR-221-3p                                                  |
| 5      | CCND2   | hsa-miR-15a-5p hsa-miR-15b-5p hsa-miR-16-5p hsa-miR-17-5p hsa-<br>miR-20a-5p                                                                  |
| 5      | CCNE2   | hsa-miR-15a-5p hsa-miR-15b-5p hsa-miR-16-5p hsa-miR-25-3p hsa-<br>miR-34a-5p                                                                  |
| 5      | CDK6    | hsa-miR-15a-5p hsa-miR-15b-5p hsa-miR-16-5p hsa-miR-221-3p<br>hsa-miR-34a-5p                                                                  |
| 5      | ELK4    | hsa-miR-106a-5p hsa-miR-15a-5p hsa-miR-15b-5p hsa-miR-16-5p<br>hsa-miR-20a-5p                                                                 |
| 5      | EZH1    | hsa-miR-15a-5p hsa-miR-15b-5p hsa-miR-16-5p hsa-miR-20a-5p<br>hsa-miR-766-3p                                                                  |
| 5      | FEM1C   | hsa-miR-106a-5p hsa-miR-16-5p hsa-miR-17-5p hsa-miR-20a-5p<br>hsa-miR-20b-5p                                                                  |
| 5      | KATNAL1 | hsa-miR-106a-5p hsa-miR-15a-5p hsa-miR-15b-5p hsa-miR-16-5p<br>hsa-miR-20a-5p                                                                 |

|   |          |                                                                             |
|---|----------|-----------------------------------------------------------------------------|
| 5 | KIF5B    | hsa-miR-15a-5p hsa-miR-15b-5p hsa-miR-16-5p hsa-miR-25-3p hsa-miR-92a-3p    |
| 5 | NOTCH2   | hsa-miR-15a-5p hsa-miR-15b-5p hsa-miR-16-5p hsa-miR-181a-5p hsa-miR-34a-5p  |
| 5 | NUP50    | hsa-miR-15a-5p hsa-miR-15b-5p hsa-miR-16-5p hsa-miR-34a-3p hsa-miR-877-3p   |
| 5 | RPRD2    | hsa-miR-106a-5p hsa-miR-15a-5p hsa-miR-15b-5p hsa-miR-16-5p hsa-miR-30b-3p  |
| 5 | SGMS1    | hsa-miR-106a-5p hsa-miR-17-5p hsa-miR-20a-5p hsa-miR-20b-5p hsa-miR-32-3p   |
| 5 | STAT3    | hsa-miR-106a-5p hsa-miR-17-5p hsa-miR-181a-5p hsa-miR-20a-5p hsa-miR-20b-5p |
| 5 | SUPT16H  | hsa-miR-15a-5p hsa-miR-15b-5p hsa-miR-16-5p hsa-miR-647 hsa-miR-877-3p      |
| 5 | SUV420H1 | hsa-miR-106a-5p hsa-miR-17-5p hsa-miR-20a-5p hsa-miR-20b-5p hsa-miR-92a-3p  |
| 5 | ULK1     | hsa-miR-106a-5p hsa-miR-17-5p hsa-miR-181a-5p hsa-miR-20a-5p hsa-miR-20b-5p |
| 5 | ZBTB33   | hsa-miR-106a-5p hsa-miR-15a-5p hsa-miR-15b-5p hsa-miR-16-5p hsa-miR-20a-5p  |
| 5 | ZMAT3    | hsa-miR-15a-5p hsa-miR-15b-5p hsa-miR-16-5p hsa-miR-193a-3p hsa-miR-374b-3p |
| 4 | AGO4     | hsa-miR-15a-5p hsa-miR-15b-5p hsa-miR-16-5p hsa-miR-92a-3p                  |
| 4 | ABL2     | hsa-miR-15a-5p hsa-miR-15b-5p hsa-miR-16-5p hsa-miR-20a-5p                  |
| 4 | ACTR2    | hsa-miR-15a-5p hsa-miR-15b-5p hsa-miR-16-5p hsa-miR-20a-5p                  |
| 4 | AFF4     | hsa-miR-15a-5p hsa-miR-15b-5p hsa-miR-16-5p hsa-miR-181a-5p                 |
| 4 | AKAP11   | hsa-miR-15a-5p hsa-miR-15b-5p hsa-miR-16-5p hsa-miR-20a-5p                  |
| 4 | ANKFY1   | hsa-miR-193a-3p hsa-miR-20a-5p hsa-miR-30b-3p hsa-miR-766-3p                |
| 4 | ANKRD13C | hsa-miR-17-5p hsa-miR-181a-5p hsa-miR-20a-5p hsa-miR-20b-5p                 |
| 4 | ARCN1    | hsa-miR-15a-5p hsa-miR-15b-5p hsa-miR-16-5p hsa-miR-20a-5p                  |
| 4 | ASH1L    | hsa-miR-15a-5p hsa-miR-15b-5p hsa-miR-16-5p hsa-miR-374b-3p                 |
| 4 | ATL3     | hsa-miR-106a-5p hsa-miR-17-5p hsa-miR-20a-5p hsa-miR-20b-5p                 |
| 4 | ATP13A3  | hsa-miR-15a-5p hsa-miR-15b-5p hsa-miR-16-5p hsa-miR-34a-3p                  |
| 4 | ATXN1    | hsa-miR-106a-5p hsa-miR-20a-5p hsa-miR-221-3p hsa-miR-92a-3p                |
| 4 | ATXN7L3B | hsa-miR-15a-5p hsa-miR-15b-5p hsa-miR-16-5p hsa-miR-20a-5p                  |
| 4 | BCL2     | hsa-miR-15a-5p hsa-miR-15b-5p hsa-miR-16-5p hsa-miR-34a-5p                  |
| 4 | BICD2    | hsa-miR-106a-5p hsa-miR-17-5p hsa-miR-20a-5p hsa-miR-766-3p                 |
| 4 | BNIP2    | hsa-miR-106a-5p hsa-miR-17-5p hsa-miR-20a-5p hsa-miR-20b-5p                 |
| 4 | BZW1     | hsa-miR-15a-5p hsa-miR-15b-5p hsa-miR-16-5p hsa-miR-19b-1-5p                |
| 4 | CANX     | hsa-miR-136-3p hsa-miR-15a-5p hsa-miR-15b-5p hsa-miR-16-5p                  |
| 4 | CAPZA2   | hsa-miR-15a-5p hsa-miR-15b-5p hsa-miR-16-5p hsa-miR-32-3p                   |
| 4 | CCDC71L  | hsa-miR-106a-5p hsa-miR-17-5p hsa-miR-20a-5p hsa-miR-20b-5p                 |
| 4 | CCNT1    | hsa-miR-15a-5p hsa-miR-15b-5p hsa-miR-16-5p hsa-miR-221-5p                  |
| 4 | CD2AP    | hsa-miR-15a-5p hsa-miR-15b-5p hsa-miR-16-5p hsa-miR-92a-3p                  |
| 4 | CDC27    | hsa-miR-15a-5p hsa-miR-15b-5p hsa-miR-16-5p hsa-miR-92a-3p                  |
| 4 | CDKN1A   | hsa-miR-106a-5p hsa-miR-17-5p hsa-miR-20a-5p hsa-miR-20b-5p                 |
| 4 | CRKL     | hsa-miR-15a-5p hsa-miR-15b-5p hsa-miR-16-5p hsa-miR-17-3p                   |
| 4 | DCTN5    | hsa-miR-15a-5p hsa-miR-15b-5p hsa-miR-16-5p hsa-miR-34a-5p                  |
| 4 | DNAJB9   | hsa-miR-106a-5p hsa-miR-20a-5p hsa-miR-25-3p hsa-miR-92a-3p                 |
| 4 | DNAJC10  | hsa-miR-15a-5p hsa-miR-15b-5p hsa-miR-16-5p hsa-miR-20a-5p                  |
| 4 | EFCAB14  | hsa-miR-106a-5p hsa-miR-17-5p hsa-miR-20a-5p hsa-miR-20b-5p                 |
| 4 | EIF2S1   | hsa-miR-106a-5p hsa-miR-17-5p hsa-miR-20a-5p hsa-miR-20b-5p                 |

|   |          |                                                                |
|---|----------|----------------------------------------------------------------|
| 4 | EN2      | hsa-miR-15a-5p hsa-miR-15b-5p hsa-miR-16-5p hsa-miR-766-5p     |
| 4 | FAM129A  | hsa-miR-106a-5p hsa-miR-20a-5p hsa-miR-25-3p hsa-miR-92a-3p    |
| 4 | FEM1B    | hsa-miR-106a-5p hsa-miR-20a-5p hsa-miR-374b-3p hsa-miR-550a-3p |
| 4 | FGF2     | hsa-miR-15a-5p hsa-miR-15b-5p hsa-miR-16-5p hsa-miR-92a-3p     |
| 4 | FOXK1    | hsa-miR-15a-5p hsa-miR-15b-5p hsa-miR-16-5p hsa-miR-17-3p      |
| 4 | GALNT7   | hsa-miR-16-5p hsa-miR-17-3p hsa-miR-25-3p hsa-miR-92a-3p       |
| 4 | GATA6    | hsa-miR-181a-5p hsa-miR-20a-5p hsa-miR-25-3p hsa-miR-92a-3p    |
| 4 | GIGYF1   | hsa-miR-106a-5p hsa-miR-20a-5p hsa-miR-34b-5p hsa-miR-877-3p   |
| 4 | HDGF     | hsa-miR-15a-3p hsa-miR-15a-5p hsa-miR-15b-5p hsa-miR-16-5p     |
| 4 | HOXA10   | hsa-miR-15a-5p hsa-miR-15b-5p hsa-miR-16-5p hsa-miR-411-3p     |
| 4 | HSPA1B   | hsa-miR-15a-5p hsa-miR-15b-5p hsa-miR-16-5p hsa-miR-34a-5p     |
| 4 | ICMT     | hsa-miR-106a-5p hsa-miR-17-5p hsa-miR-20a-5p hsa-miR-20b-5p    |
| 4 | JARID2   | hsa-miR-15a-5p hsa-miR-15b-5p hsa-miR-16-5p hsa-miR-197-3p     |
| 4 | KPNA1    | hsa-miR-15a-5p hsa-miR-15b-5p hsa-miR-16-5p hsa-miR-34a-5p     |
| 4 | LAPTM4A  | hsa-miR-106a-5p hsa-miR-17-5p hsa-miR-20a-5p hsa-miR-20b-5p    |
| 4 | MORF4L1  | hsa-miR-106a-5p hsa-miR-16-5p hsa-miR-17-5p hsa-miR-20a-5p     |
| 4 | MYH9     | hsa-miR-149-3p hsa-miR-30b-3p hsa-miR-877-3p hsa-miR-92a-3p    |
| 4 | MYO5A    | hsa-miR-15a-5p hsa-miR-15b-5p hsa-miR-16-5p hsa-miR-92a-3p     |
| 4 | PAFAH1B1 | hsa-miR-15a-5p hsa-miR-15b-5p hsa-miR-16-5p hsa-miR-20a-5p     |
| 4 | PAFAH1B2 | hsa-miR-15a-5p hsa-miR-15b-5p hsa-miR-16-5p hsa-miR-221-3p     |
| 4 | PPP2R5C  | hsa-miR-15a-5p hsa-miR-15b-5p hsa-miR-16-5p hsa-miR-193a-3p    |
| 4 | PRKAR2A  | hsa-miR-15a-5p hsa-miR-15b-5p hsa-miR-16-5p hsa-miR-197-3p     |
| 4 | PROSC    | hsa-miR-15a-5p hsa-miR-15b-5p hsa-miR-16-5p hsa-miR-34a-5p     |
| 4 | PTAR1    | hsa-miR-16-2-3p hsa-miR-25-3p hsa-miR-34b-5p hsa-miR-92a-3p    |
| 4 | PTP4A1   | hsa-miR-106a-5p hsa-miR-20a-5p hsa-miR-32-3p hsa-miR-374b-3p   |
| 4 | PURA     | hsa-miR-15a-5p hsa-miR-15b-5p hsa-miR-16-5p hsa-miR-20a-5p     |
| 4 | RGMB     | hsa-miR-106a-5p hsa-miR-17-5p hsa-miR-20a-5p hsa-miR-20b-5p    |
| 4 | RORA     | hsa-miR-106a-5p hsa-miR-20a-5p hsa-miR-32-3p hsa-miR-92a-3p    |
| 4 | SESN3    | hsa-miR-17-5p hsa-miR-20a-5p hsa-miR-25-3p hsa-miR-92a-3p      |
| 4 | SF3B3    | hsa-miR-106a-5p hsa-miR-15b-5p hsa-miR-16-5p hsa-miR-34a-5p    |
| 4 | SGTB     | hsa-miR-106a-5p hsa-miR-17-5p hsa-miR-20a-5p hsa-miR-20b-5p    |
| 4 | SKIL     | hsa-miR-106a-5p hsa-miR-17-5p hsa-miR-20a-5p hsa-miR-20b-5p    |
| 4 | SOX4     | hsa-miR-106a-5p hsa-miR-20a-5p hsa-miR-25-3p hsa-miR-92a-3p    |
| 4 | SPRED1   | hsa-miR-126-3p hsa-miR-15a-5p hsa-miR-15b-5p hsa-miR-16-5p     |
| 4 | SQSTM1   | hsa-miR-16-5p hsa-miR-17-5p hsa-miR-20a-5p hsa-miR-20b-5p      |
| 4 | SRPRB    | hsa-miR-15a-5p hsa-miR-15b-5p hsa-miR-16-5p hsa-miR-92a-3p     |
| 4 | TMEM245  | hsa-miR-15a-5p hsa-miR-15b-5p hsa-miR-16-5p hsa-miR-93-3p      |
| 4 | TTC9     | hsa-miR-106a-5p hsa-miR-17-5p hsa-miR-20a-5p hsa-miR-20b-5p    |
| 4 | UBE2Q1   | hsa-miR-15a-5p hsa-miR-15b-5p hsa-miR-16-5p hsa-miR-197-5p     |
| 4 | USP31    | hsa-miR-15a-5p hsa-miR-15b-5p hsa-miR-16-5p hsa-miR-92a-3p     |
| 4 | YTHDC1   | hsa-miR-106a-5p hsa-miR-15a-5p hsa-miR-15b-5p hsa-miR-16-5p    |
| 4 | ZBTB7A   | hsa-miR-106a-5p hsa-miR-17-5p hsa-miR-20a-5p hsa-miR-20b-5p    |
| 4 | ZFHX4    | hsa-miR-15a-5p hsa-miR-15b-5p hsa-miR-16-5p hsa-miR-92a-3p     |
| 4 | ZNF264   | hsa-miR-106a-5p hsa-miR-20a-5p hsa-miR-25-3p hsa-miR-92a-3p    |
| 3 | ABCF2    | hsa-miR-16-5p hsa-miR-25-3p hsa-miR-92a-3p                     |
| 3 | ACOX1    | hsa-miR-15a-5p hsa-miR-15b-5p hsa-miR-16-5p                    |
| 3 | ACVR1B   | hsa-miR-15a-5p hsa-miR-197-3p hsa-miR-20a-5p                   |
| 3 | ACVR2A   | hsa-miR-15a-5p hsa-miR-15b-5p hsa-miR-16-5p                    |
| 3 | AGFG2    | hsa-miR-17-5p hsa-miR-20a-5p hsa-miR-20b-5p                    |
| 3 | AMOTL1   | hsa-miR-15a-5p hsa-miR-15b-5p hsa-miR-16-5p                    |
| 3 | ANAPC13  | hsa-miR-15a-5p hsa-miR-15b-5p hsa-miR-16-5p                    |

|   |          |                                                |
|---|----------|------------------------------------------------|
| 3 | ANKIB1   | hsa-miR-20a-5p hsa-miR-25-3p hsa-miR-92a-3p    |
| 3 | ANKRD52  | hsa-miR-106a-5p hsa-miR-20a-5p hsa-miR-629-3p  |
| 3 | ANP32E   | hsa-miR-25-3p hsa-miR-877-3p hsa-miR-92a-3p    |
| 3 | ARAP2    | hsa-miR-17-5p hsa-miR-20a-5p hsa-miR-20b-5p    |
| 3 | ARFGEF2  | hsa-miR-20a-5p hsa-miR-766-3p hsa-miR-92a-3p   |
| 3 | ARHGAP1  | hsa-miR-20a-5p hsa-miR-25-5p hsa-miR-34a-5p    |
| 3 | ARHGAP35 | hsa-miR-17-5p hsa-miR-20a-5p hsa-miR-20b-5p    |
| 3 | ARHGDI1  | hsa-miR-15a-5p hsa-miR-15b-5p hsa-miR-16-5p    |
| 3 | ATP5G3   | hsa-miR-15a-5p hsa-miR-15b-5p hsa-miR-16-5p    |
| 3 | AXIN2    | hsa-miR-15a-5p hsa-miR-15b-5p hsa-miR-16-5p    |
| 3 | B3GNT2   | hsa-miR-15a-5p hsa-miR-15b-5p hsa-miR-16-5p    |
| 3 | B4GALT1  | hsa-miR-15a-5p hsa-miR-15b-5p hsa-miR-16-5p    |
| 3 | BAG4     | hsa-miR-15a-5p hsa-miR-15b-5p hsa-miR-16-5p    |
| 3 | BCL7A    | hsa-miR-15a-5p hsa-miR-15b-5p hsa-miR-16-5p    |
| 3 | CA8      | hsa-miR-15a-5p hsa-miR-15b-5p hsa-miR-16-5p    |
| 3 | CACUL1   | hsa-miR-15a-5p hsa-miR-15b-5p hsa-miR-16-5p    |
| 3 | CAMK2N2  | hsa-miR-17-5p hsa-miR-20a-5p hsa-miR-20b-5p    |
| 3 | CAMTA1   | hsa-miR-17-5p hsa-miR-20a-5p hsa-miR-20b-5p    |
| 3 | CARD10   | hsa-miR-15a-5p hsa-miR-15b-5p hsa-miR-16-5p    |
| 3 | CBX2     | hsa-miR-15a-5p hsa-miR-15b-5p hsa-miR-16-5p    |
| 3 | CBX4     | hsa-miR-15a-5p hsa-miR-15b-5p hsa-miR-16-5p    |
| 3 | CBX5     | hsa-miR-17-5p hsa-miR-20a-5p hsa-miR-92a-3p    |
| 3 | CBX6     | hsa-miR-15a-5p hsa-miR-15b-5p hsa-miR-16-5p    |
| 3 | CCNE1    | hsa-miR-15a-5p hsa-miR-15b-5p hsa-miR-16-5p    |
| 3 | CCNT2    | hsa-miR-15a-5p hsa-miR-15b-5p hsa-miR-16-5p    |
| 3 | CDC37L1  | hsa-miR-15a-5p hsa-miR-15b-5p hsa-miR-16-5p    |
| 3 | CDC42SE2 | hsa-miR-15a-5p hsa-miR-15b-5p hsa-miR-16-5p    |
| 3 | CDCA4    | hsa-miR-15a-5p hsa-miR-15b-5p hsa-miR-16-5p    |
| 3 | CDK17    | hsa-miR-15a-5p hsa-miR-15b-5p hsa-miR-16-5p    |
| 3 | CDS2     | hsa-miR-15a-5p hsa-miR-15b-5p hsa-miR-16-5p    |
| 3 | CDV3     | hsa-miR-15a-5p hsa-miR-15b-5p hsa-miR-16-5p    |
| 3 | CEP104   | hsa-miR-106a-5p hsa-miR-17-5p hsa-miR-20a-5p   |
| 3 | CEP55    | hsa-miR-15a-5p hsa-miR-15b-5p hsa-miR-16-5p    |
| 3 | CHAC1    | hsa-miR-15a-5p hsa-miR-15b-5p hsa-miR-16-5p    |
| 3 | CHMP3    | hsa-miR-15a-5p hsa-miR-15b-5p hsa-miR-16-5p    |
| 3 | CLIC4    | hsa-miR-106a-5p hsa-miR-17-5p hsa-miR-20a-5p   |
| 3 | CMPK1    | hsa-miR-16-5p hsa-miR-17-5p hsa-miR-20b-5p     |
| 3 | CMTM4    | hsa-miR-15a-5p hsa-miR-15b-5p hsa-miR-16-5p    |
| 3 | CNOT4    | hsa-miR-106a-5p hsa-miR-20a-5p hsa-miR-34a-5p  |
| 3 | CREG1    | hsa-miR-15a-5p hsa-miR-15b-5p hsa-miR-16-5p    |
| 3 | CRIM1    | hsa-miR-15b-5p hsa-miR-16-5p hsa-miR-20a-5p    |
| 3 | CSDE1    | hsa-miR-15a-5p hsa-miR-15b-5p hsa-miR-16-5p    |
| 3 | CYP26B1  | hsa-miR-15a-5p hsa-miR-15b-5p hsa-miR-16-5p    |
| 3 | DDIT4    | hsa-miR-181a-5p hsa-miR-221-3p hsa-miR-92a-3p  |
| 3 | DNAJA1   | hsa-miR-15a-5p hsa-miR-15b-5p hsa-miR-16-5p    |
| 3 | DUSP18   | hsa-miR-17-5p hsa-miR-20a-5p hsa-miR-20b-5p    |
| 3 | DYNC1LI2 | hsa-miR-106a-5p hsa-miR-181a-5p hsa-miR-20a-5p |
| 3 | EDC3     | hsa-miR-15a-5p hsa-miR-15b-5p hsa-miR-16-5p    |
| 3 | FASN     | hsa-miR-15a-5p hsa-miR-15b-5p hsa-miR-16-5p    |
| 3 | FBXO3    | hsa-miR-15a-5p hsa-miR-16-5p hsa-miR-20a-5p    |
| 3 | FCF1     | hsa-miR-15a-5p hsa-miR-15b-5p hsa-miR-16-5p    |
| 3 | FCHO2    | hsa-miR-17-5p hsa-miR-20a-5p hsa-miR-20b-5p    |

|   |           |                                               |
|---|-----------|-----------------------------------------------|
| 3 | FICD      | hsa-miR-17-5p hsa-miR-20a-5p hsa-miR-20b-5p   |
| 3 | FNDC3B    | hsa-miR-16-5p hsa-miR-25-3p hsa-miR-92a-3p    |
| 3 | GALNT1    | hsa-miR-15a-5p hsa-miR-15b-5p hsa-miR-16-5p   |
| 3 | GATAD2B   | hsa-miR-221-5p hsa-miR-25-3p hsa-miR-92a-3p   |
| 3 | GFPT1     | hsa-miR-16-5p hsa-miR-34a-5p hsa-miR-34b-3p   |
| 3 | GOSR1     | hsa-miR-15a-5p hsa-miR-15b-5p hsa-miR-16-5p   |
| 3 | GRB2      | hsa-miR-15a-5p hsa-miR-15b-5p hsa-miR-16-5p   |
| 3 | GSK3B     | hsa-let-7b-3p hsa-miR-877-3p hsa-miR-92a-3p   |
| 3 | HIPK1     | hsa-miR-7-1-3p hsa-miR-766-5p hsa-miR-92a-3p  |
| 3 | HNF4A     | hsa-miR-197-3p hsa-miR-34a-5p hsa-miR-766-3p  |
| 3 | HNRNPA2B1 | hsa-miR-15a-5p hsa-miR-15b-5p hsa-miR-16-5p   |
| 3 | IGF1R     | hsa-miR-16-5p hsa-miR-34a-3p hsa-miR-885-5p   |
| 3 | IGFBP5    | hsa-miR-193a-3p hsa-miR-197-3p hsa-miR-411-3p |
| 3 | IPPK      | hsa-miR-15a-5p hsa-miR-15b-5p hsa-miR-16-5p   |
| 3 | IRGQ      | hsa-miR-34a-5p hsa-miR-766-3p hsa-miR-92a-3p  |
| 3 | ITPKB     | hsa-miR-17-5p hsa-miR-20a-5p hsa-miR-20b-5p   |
| 3 | KMT2D     | hsa-miR-15b-5p hsa-miR-34a-5p hsa-miR-766-3p  |
| 3 | LAMP2     | hsa-miR-15a-5p hsa-miR-15b-5p hsa-miR-16-5p   |
| 3 | LAMTOR1   | hsa-miR-106a-5p hsa-miR-16-5p hsa-miR-20a-5p  |
| 3 | LDLR      | hsa-miR-106a-5p hsa-miR-20a-5p hsa-miR-7-1-3p |
| 3 | LHFPL2    | hsa-miR-221-3p hsa-miR-25-3p hsa-miR-92a-3p   |
| 3 | LRIG2     | hsa-miR-15a-5p hsa-miR-15b-5p hsa-miR-16-5p   |
| 3 | LRPPRC    | hsa-miR-15a-5p hsa-miR-15b-5p hsa-miR-16-5p   |
| 3 | LSM11     | hsa-miR-15a-5p hsa-miR-15b-5p hsa-miR-16-5p   |
| 3 | MAFK      | hsa-miR-15a-5p hsa-miR-15b-5p hsa-miR-16-5p   |
| 3 | MAPK1     | hsa-miR-106a-5p hsa-miR-20a-5p hsa-miR-766-3p |
| 3 | MIB1      | hsa-miR-15a-5p hsa-miR-15b-5p hsa-miR-16-5p   |
| 3 | MOAP1     | hsa-miR-25-3p hsa-miR-34a-5p hsa-miR-92a-3p   |
| 3 | MTHFR     | hsa-miR-15a-5p hsa-miR-15b-5p hsa-miR-16-5p   |
| 3 | MTMR3     | hsa-miR-15a-5p hsa-miR-15b-5p hsa-miR-16-5p   |
| 3 | N4BP1     | hsa-miR-15a-5p hsa-miR-15b-5p hsa-miR-16-5p   |
| 3 | NAA25     | hsa-miR-15a-5p hsa-miR-15b-5p hsa-miR-16-5p   |
| 3 | NAPG      | hsa-miR-15a-5p hsa-miR-15b-5p hsa-miR-16-5p   |
| 3 | NCOR2     | hsa-miR-15a-5p hsa-miR-15b-5p hsa-miR-16-5p   |
| 3 | NETO2     | hsa-miR-106a-5p hsa-miR-17-5p hsa-miR-20a-5p  |
| 3 | NRAS      | hsa-miR-20a-5p hsa-miR-25-3p hsa-miR-92a-3p   |
| 3 | NRBP1     | hsa-miR-106a-5p hsa-miR-20a-5p hsa-miR-766-5p |
| 3 | NUP160    | hsa-miR-15b-5p hsa-miR-16-5p hsa-miR-93-3p    |
| 3 | OGT       | hsa-miR-15a-5p hsa-miR-15b-5p hsa-miR-16-5p   |
| 3 | PAG1      | hsa-miR-15a-5p hsa-miR-15b-5p hsa-miR-16-5p   |
| 3 | PAK2      | hsa-miR-15a-5p hsa-miR-15b-5p hsa-miR-16-5p   |
| 3 | PAPD7     | hsa-miR-16-2-3p hsa-miR-25-3p hsa-miR-92a-3p  |
| 3 | PDE4D     | hsa-miR-15a-5p hsa-miR-15b-5p hsa-miR-16-5p   |
| 3 | PEG10     | hsa-miR-32-3p hsa-miR-34a-5p hsa-miR-766-5p   |
| 3 | PGD       | hsa-miR-15a-5p hsa-miR-15b-5p hsa-miR-16-5p   |
| 3 | PHTF2     | hsa-miR-106a-5p hsa-miR-20a-5p hsa-miR-92a-3p |
| 3 | PI4K2B    | hsa-miR-15a-5p hsa-miR-15b-5p hsa-miR-16-5p   |
| 3 | PISD      | hsa-miR-15a-5p hsa-miR-15b-5p hsa-miR-16-5p   |
| 3 | PLAG1     | hsa-miR-15a-5p hsa-miR-15b-5p hsa-miR-16-5p   |
| 3 | PPAP2B    | hsa-miR-15a-5p hsa-miR-15b-5p hsa-miR-16-5p   |
| 3 | PPIG      | hsa-miR-15a-5p hsa-miR-15b-5p hsa-miR-16-5p   |
| 3 | PPIL1     | hsa-miR-15a-5p hsa-miR-15b-5p hsa-miR-16-5p   |

|   |          |                                               |
|---|----------|-----------------------------------------------|
| 3 | PPP1R15B | hsa-miR-106a-5p hsa-miR-20a-5p hsa-miR-221-3p |
| 3 | PRDM4    | hsa-miR-15a-5p hsa-miR-15b-5p hsa-miR-16-5p   |
| 3 | PRNP     | hsa-miR-17-5p hsa-miR-20b-5p hsa-miR-221-5p   |
| 3 | PSAT1    | hsa-miR-15a-5p hsa-miR-15b-5p hsa-miR-16-5p   |
| 3 | PSKH1    | hsa-miR-15a-5p hsa-miR-15b-5p hsa-miR-16-5p   |
| 3 | PTPDC1   | hsa-miR-16-5p hsa-miR-17-5p hsa-miR-20a-5p    |
| 3 | RACGAP1  | hsa-miR-15a-5p hsa-miR-15b-5p hsa-miR-16-5p   |
| 3 | RAD23B   | hsa-miR-15a-5p hsa-miR-15b-5p hsa-miR-16-5p   |
| 3 | RAPH1    | hsa-miR-15a-5p hsa-miR-15b-5p hsa-miR-16-5p   |
| 3 | RBM27    | hsa-miR-15b-5p hsa-miR-25-3p hsa-miR-92a-3p   |
| 3 | RECK     | hsa-miR-15a-5p hsa-miR-15b-5p hsa-miR-16-5p   |
| 3 | REEP3    | hsa-miR-106a-5p hsa-miR-20a-5p hsa-miR-34a-5p |
| 3 | RIF1     | hsa-miR-15a-5p hsa-miR-15b-5p hsa-miR-16-5p   |
| 3 | RLIM     | hsa-miR-106a-5p hsa-miR-15b-5p hsa-miR-20a-5p |
| 3 | RNF138   | hsa-miR-15a-5p hsa-miR-15b-5p hsa-miR-16-5p   |
| 3 | RNF149   | hsa-miR-15a-5p hsa-miR-15b-5p hsa-miR-16-5p   |
| 3 | RNF168   | hsa-miR-15a-5p hsa-miR-15b-5p hsa-miR-16-5p   |
| 3 | RNF44    | hsa-miR-221-3p hsa-miR-25-3p hsa-miR-92a-3p   |
| 3 | RNMT     | hsa-miR-15a-5p hsa-miR-15b-5p hsa-miR-16-5p   |
| 3 | RPS6KA3  | hsa-miR-15a-5p hsa-miR-15b-5p hsa-miR-16-5p   |
| 3 | RRAGD    | hsa-miR-106a-5p hsa-miR-20a-5p hsa-miR-221-5p |
| 3 | RRN3     | hsa-miR-20a-5p hsa-miR-25-3p hsa-miR-92a-3p   |
| 3 | RTN4     | hsa-miR-15a-5p hsa-miR-15b-5p hsa-miR-16-5p   |
| 3 | SAMD12   | hsa-miR-17-5p hsa-miR-20a-5p hsa-miR-20b-5p   |
| 3 | SAMD9L   | hsa-miR-17-5p hsa-miR-20a-5p hsa-miR-20b-5p   |
| 3 | SCAMP4   | hsa-miR-15a-5p hsa-miR-15b-5p hsa-miR-16-5p   |
| 3 | SESN2    | hsa-miR-17-3p hsa-miR-20a-5p hsa-miR-34a-5p   |
| 3 | SESTD1   | hsa-miR-15a-5p hsa-miR-15b-5p hsa-miR-16-5p   |
| 3 | SHOC2    | hsa-miR-106a-5p hsa-miR-16-5p hsa-miR-34a-5p  |
| 3 | SLC22A23 | hsa-miR-17-5p hsa-miR-20a-5p hsa-miR-20b-5p   |
| 3 | SLC25A22 | hsa-miR-15a-5p hsa-miR-15b-5p hsa-miR-16-5p   |
| 3 | SLC25A36 | hsa-miR-221-3p hsa-miR-25-3p hsa-miR-92a-3p   |
| 3 | SLC2A3   | hsa-miR-15a-5p hsa-miR-15b-5p hsa-miR-16-5p   |
| 3 | SLC7A11  | hsa-miR-181a-5p hsa-miR-20a-5p hsa-miR-92a-3p |
| 3 | SMAD5    | hsa-miR-17-5p hsa-miR-20a-5p hsa-miR-20b-5p   |
| 3 | SNTB2    | hsa-miR-15a-5p hsa-miR-15b-5p hsa-miR-16-5p   |
| 3 | SREK1    | hsa-miR-15a-5p hsa-miR-15b-5p hsa-miR-16-5p   |
| 3 | STK38    | hsa-miR-15a-5p hsa-miR-15b-5p hsa-miR-16-5p   |
| 3 | STXBP3   | hsa-miR-15a-5p hsa-miR-15b-5p hsa-miR-16-5p   |
| 3 | TADA2B   | hsa-miR-15a-5p hsa-miR-15b-5p hsa-miR-16-5p   |
| 3 | TAOK1    | hsa-miR-15a-5p hsa-miR-15b-5p hsa-miR-16-5p   |
| 3 | TBC1D20  | hsa-miR-15a-5p hsa-miR-15b-5p hsa-miR-16-5p   |
| 3 | TBCCD1   | hsa-miR-15a-5p hsa-miR-15b-5p hsa-miR-16-5p   |
| 3 | TBL1XR1  | hsa-miR-15a-5p hsa-miR-15b-5p hsa-miR-16-5p   |
| 3 | TBPL1    | hsa-miR-15a-5p hsa-miR-15b-5p hsa-miR-16-5p   |
| 3 | TCF3     | hsa-miR-15a-5p hsa-miR-15b-5p hsa-miR-16-5p   |
| 3 | TIMM13   | hsa-miR-15a-5p hsa-miR-15b-5p hsa-miR-16-5p   |
| 3 | TM4SF1   | hsa-miR-15a-5p hsa-miR-15b-5p hsa-miR-16-5p   |
| 3 | TM9SF2   | hsa-miR-15a-5p hsa-miR-15b-5p hsa-miR-16-5p   |
| 3 | TM9SF3   | hsa-miR-15b-5p hsa-miR-16-2-3p hsa-miR-34a-5p |
| 3 | TMEM109  | hsa-miR-15a-5p hsa-miR-16-5p hsa-miR-34a-5p   |
| 3 | TMEM167A | hsa-miR-17-5p hsa-miR-20a-5p hsa-miR-20b-5p   |

|   |             |                 |                 |                 |
|---|-------------|-----------------|-----------------|-----------------|
| 3 | MEM189-UBE2 | hsa-miR-15a-5p  | hsa-miR-15b-5p  | hsa-miR-16-5p   |
| 3 | TMEM55B     | hsa-miR-15a-5p  | hsa-miR-15b-5p  | hsa-miR-16-5p   |
| 3 | TNKS2       | hsa-miR-106a-5p | hsa-miR-20a-5p  | hsa-miR-221-3p  |
| 3 | TNPO1       | hsa-miR-16-2-3p | hsa-miR-16-5p   | hsa-miR-92a-3p  |
| 3 | TRAM2       | hsa-miR-25-3p   | hsa-miR-34a-3p  | hsa-miR-92a-3p  |
| 3 | TRIM35      | hsa-miR-15a-5p  | hsa-miR-15b-5p  | hsa-miR-16-5p   |
| 3 | TSPAN3      | hsa-miR-15b-5p  | hsa-miR-16-5p   | hsa-miR-197-3p  |
| 3 | TTC1        | hsa-miR-15a-5p  | hsa-miR-15b-5p  | hsa-miR-16-5p   |
| 3 | TUBB        | hsa-miR-15a-5p  | hsa-miR-15b-5p  | hsa-miR-16-5p   |
| 3 | TXLNA       | hsa-miR-15b-5p  | hsa-miR-877-3p  | hsa-miR-92a-3p  |
| 3 | UBE2Q2      | hsa-miR-17-5p   | hsa-miR-20a-5p  | hsa-miR-20b-5p  |
| 3 | UBE2Z       | hsa-miR-16-5p   | hsa-miR-25-3p   | hsa-miR-92a-3p  |
| 3 | UBN2        | hsa-miR-15a-5p  | hsa-miR-15b-5p  | hsa-miR-16-5p   |
| 3 | WDR37       | hsa-miR-20a-5p  | hsa-miR-32-3p   | hsa-miR-92a-3p  |
| 3 | WIPF2       | hsa-miR-106a-5p | hsa-miR-20a-5p  | hsa-miR-92a-3p  |
| 3 | WIPI2       | hsa-miR-15a-5p  | hsa-miR-15b-5p  | hsa-miR-16-5p   |
| 3 | XIAP        | hsa-miR-20a-5p  | hsa-miR-30b-3p  | hsa-miR-34b-5p  |
| 3 | YOD1        | hsa-miR-106a-5p | hsa-miR-20a-5p  | hsa-miR-550a-3p |
| 3 | YRDC        | hsa-miR-15a-5p  | hsa-miR-15b-5p  | hsa-miR-16-5p   |
| 3 | ZBTB10      | hsa-miR-15a-5p  | hsa-miR-15b-5p  | hsa-miR-16-5p   |
| 3 | ZBTB18      | hsa-miR-106a-5p | hsa-miR-15a-3p  | hsa-miR-20a-5p  |
| 3 | ZBTB34      | hsa-miR-15a-5p  | hsa-miR-15b-5p  | hsa-miR-16-5p   |
| 3 | ZFYVE21     | hsa-miR-20a-5p  | hsa-miR-25-3p   | hsa-miR-92a-3p  |
| 3 | ZNF267      | hsa-miR-15a-5p  | hsa-miR-16-5p   | hsa-miR-92a-3p  |
| 3 | ZNF367      | hsa-miR-15a-5p  | hsa-miR-15b-5p  | hsa-miR-16-5p   |
| 3 | ZNF622      | hsa-miR-15a-5p  | hsa-miR-15b-5p  | hsa-miR-16-5p   |
| 3 | ZNF704      | hsa-miR-15a-5p  | hsa-miR-15b-5p  | hsa-miR-16-5p   |
| 3 | ZNF770      | hsa-miR-17-5p   | hsa-miR-20a-5p  | hsa-miR-20b-5p  |
| 3 | ZNRF2       | hsa-miR-15a-5p  | hsa-miR-15b-5p  | hsa-miR-16-5p   |
| 3 | ZNRF3       | hsa-miR-15a-5p  | hsa-miR-15b-5p  | hsa-miR-16-5p   |
| 2 | ABHD2       | hsa-miR-16-5p   | hsa-miR-92a-3p  |                 |
| 2 | ABI2        | hsa-miR-136-5p  | hsa-miR-193a-3p |                 |
| 2 | ACAP2       | hsa-miR-20a-5p  | hsa-miR-766-3p  |                 |
| 2 | ADSS        | hsa-miR-16-5p   | hsa-miR-20a-3p  |                 |
| 2 | AGPAT5      | hsa-miR-15b-5p  | hsa-miR-16-5p   |                 |
| 2 | ANKRD40     | hsa-miR-30b-3p  | hsa-miR-766-5p  |                 |
| 2 | ANKRD50     | hsa-miR-106a-5p | hsa-miR-20a-5p  |                 |
| 2 | AP3D1       | hsa-miR-16-5p   | hsa-miR-20a-5p  |                 |
| 2 | ARF1        | hsa-miR-25-3p   | hsa-miR-92a-3p  |                 |
| 2 | ARL6IP1     | hsa-miR-16-2-3p | hsa-miR-543     |                 |
| 2 | ARNTL2      | hsa-miR-25-3p   | hsa-miR-92a-3p  |                 |
| 2 | ARPP19      | hsa-miR-7-1-3p  | hsa-miR-92a-3p  |                 |
| 2 | ATAD5       | hsa-miR-15a-5p  | hsa-miR-16-5p   |                 |
| 2 | ATG14       | hsa-miR-15a-5p  | hsa-miR-16-5p   |                 |
| 2 | ATP6V0E1    | hsa-miR-15b-5p  | hsa-miR-16-5p   |                 |
| 2 | AVL9        | hsa-miR-15a-5p  | hsa-miR-16-5p   |                 |
| 2 | B2M         | hsa-miR-16-2-3p | hsa-miR-20a-5p  |                 |
| 2 | BBX         | hsa-miR-106a-5p | hsa-miR-20a-5p  |                 |
| 2 | BCAT1       | hsa-miR-25-3p   | hsa-miR-92a-3p  |                 |
| 2 | BRI3BP      | hsa-miR-106a-5p | hsa-miR-20a-5p  |                 |
| 2 | BRMS1L      | hsa-miR-20a-5p  | hsa-miR-92a-3p  |                 |
| 2 | BRWD1       | hsa-miR-15a-5p  | hsa-miR-221-3p  |                 |

|   |          |                                |
|---|----------|--------------------------------|
| 2 | BTAF1    | hsa-miR-15b-5p hsa-miR-16-5p   |
| 2 | BTG1     | hsa-let-7b-3p hsa-miR-498      |
| 2 | C11orf24 | hsa-miR-25-3p hsa-miR-92a-3p   |
| 2 | C16orf72 | hsa-miR-16-5p hsa-miR-377-3p   |
| 2 | C9orf40  | hsa-miR-106a-5p hsa-miR-20a-5p |
| 2 | CAV1     | hsa-miR-20a-5p hsa-miR-34b-5p  |
| 2 | CCDC137  | hsa-miR-106a-5p hsa-miR-20a-5p |
| 2 | CCDC6    | hsa-miR-181a-5p hsa-miR-20a-5p |
| 2 | CCND3    | hsa-miR-16-5p hsa-miR-34a-5p   |
| 2 | CDC23    | hsa-miR-16-5p hsa-miR-34a-5p   |
| 2 | CDC5L    | hsa-miR-16-5p hsa-miR-7-1-3p   |
| 2 | CDK5R1   | hsa-miR-25-3p hsa-miR-92a-3p   |
| 2 | CDKN1B   | hsa-miR-181a-5p hsa-miR-221-3p |
| 2 | CENPQ    | hsa-miR-106a-5p hsa-miR-20a-5p |
| 2 | CEP97    | hsa-miR-106a-5p hsa-miR-20a-5p |
| 2 | CHUK     | hsa-miR-15a-5p hsa-miR-16-5p   |
| 2 | CKAP2    | hsa-miR-106a-5p hsa-miR-20a-5p |
| 2 | CNBP     | hsa-miR-197-3p hsa-miR-877-3p  |
| 2 | CNIH1    | hsa-miR-25-3p hsa-miR-92a-3p   |
| 2 | CNNM4    | hsa-miR-25-3p hsa-miR-92a-3p   |
| 2 | CNOT7    | hsa-miR-17-5p hsa-miR-20a-5p   |
| 2 | COL4A1   | hsa-miR-16-5p hsa-miR-92a-3p   |
| 2 | CPEB4    | hsa-miR-25-3p hsa-miR-92a-3p   |
| 2 | CPSF2    | hsa-miR-149-3p hsa-miR-193a-3p |
| 2 | CPSF7    | hsa-miR-15a-5p hsa-miR-15b-5p  |
| 2 | CREBL2   | hsa-miR-15a-5p hsa-miR-16-5p   |
| 2 | CSNK1A1  | hsa-miR-106a-5p hsa-miR-20a-5p |
| 2 | CUL5     | hsa-miR-181a-5p hsa-miR-92a-3p |
| 2 | DCAF17   | hsa-miR-15a-5p hsa-miR-15b-5p  |
| 2 | DCAF8    | hsa-miR-106a-5p hsa-miR-20a-5p |
| 2 | DCBLD2   | hsa-miR-106a-5p hsa-miR-17-5p  |
| 2 | DDI2     | hsa-miR-25-3p hsa-miR-92a-3p   |
| 2 | DDX3Y    | hsa-miR-16-5p hsa-miR-221-3p   |
| 2 | DLC1     | hsa-miR-16-5p hsa-miR-20a-5p   |
| 2 | DNAJC27  | hsa-miR-20a-5p hsa-miR-92a-3p  |
| 2 | DUSP2    | hsa-miR-106a-5p hsa-miR-20a-5p |
| 2 | DUSP5    | hsa-miR-25-3p hsa-miR-92a-3p   |
| 2 | DYRK2    | hsa-miR-193a-3p hsa-miR-20a-5p |
| 2 | E2F1     | hsa-miR-149-3p hsa-miR-20a-5p  |
| 2 | EDEM1    | hsa-miR-25-3p hsa-miR-92a-3p   |
| 2 | EID2B    | hsa-miR-25-3p hsa-miR-92a-3p   |
| 2 | EIF1     | hsa-miR-25-3p hsa-miR-92a-3p   |
| 2 | EIF5B    | hsa-miR-15b-5p hsa-miR-16-5p   |
| 2 | ELAC2    | hsa-miR-16-5p hsa-miR-92a-3p   |
| 2 | EP300    | hsa-miR-25-3p hsa-miR-92a-3p   |
| 2 | EPAS1    | hsa-miR-17-5p hsa-miR-20a-5p   |
| 2 | EPHA4    | hsa-miR-106a-5p hsa-miR-20a-5p |
| 2 | ERAP1    | hsa-miR-20a-5p hsa-miR-92a-3p  |
| 2 | ERGIC2   | hsa-miR-25-3p hsa-miR-92a-3p   |
| 2 | ERLIN2   | hsa-miR-16-5p hsa-miR-34a-5p   |
| 2 | ETF1     | hsa-miR-17-5p hsa-miR-20b-5p   |
| 2 | ETV1     | hsa-miR-17-5p hsa-miR-20a-5p   |



|   |          |                                |
|---|----------|--------------------------------|
| 2 | F2R      | hsa-miR-20a-5p hsa-miR-20b-5p  |
| 2 | F3       | hsa-miR-106a-5p hsa-miR-20a-5p |
| 2 | FAF2     | hsa-miR-17-5p hsa-miR-20a-5p   |
| 2 | FAM160B1 | hsa-miR-106a-5p hsa-miR-20a-5p |
| 2 | FBXW7    | hsa-miR-16-5p hsa-miR-25-3p    |
| 2 | FJX1     | hsa-miR-106a-5p hsa-miR-20a-5p |
| 2 | FKBP14   | hsa-miR-106a-5p hsa-miR-20a-5p |
| 2 | FOS      | hsa-miR-221-3p hsa-miR-543     |
| 2 | FOXC1    | hsa-miR-17-5p hsa-miR-20a-5p   |
| 2 | FOXJ2    | hsa-miR-106a-5p hsa-miR-20a-5p |
| 2 | FOXJ3    | hsa-miR-106a-5p hsa-miR-20a-5p |
| 2 | FOXN2    | hsa-miR-25-3p hsa-miR-92a-3p   |
| 2 | FRS2     | hsa-miR-106a-5p hsa-miR-20a-5p |
| 2 | G3BP2    | hsa-miR-16-5p hsa-miR-92a-3p   |
| 2 | GAB1     | hsa-miR-17-5p hsa-miR-20a-5p   |
| 2 | GDF11    | hsa-miR-106a-5p hsa-miR-20a-5p |
| 2 | GDI2     | hsa-miR-15a-5p hsa-miR-20a-5p  |
| 2 | GEMIN5   | hsa-miR-34a-5p hsa-miR-877-3p  |
| 2 | GFPT2    | hsa-miR-25-3p hsa-miR-92a-3p   |
| 2 | GID4     | hsa-miR-25-3p hsa-miR-92a-3p   |
| 2 | GLO1     | hsa-miR-106a-5p hsa-miR-20a-5p |
| 2 | GNAQ     | hsa-miR-25-3p hsa-miR-92a-3p   |
| 2 | GOLGA1   | hsa-miR-17-5p hsa-miR-20a-5p   |
| 2 | GOLGA3   | hsa-miR-25-3p hsa-miR-92a-3p   |
| 2 | GOLGA8A  | hsa-miR-25-3p hsa-miR-92a-3p   |
| 2 | GOLGA8B  | hsa-miR-25-3p hsa-miR-92a-3p   |
| 2 | GPAM     | hsa-miR-16-5p hsa-miR-20a-5p   |
| 2 | GPR137B  | hsa-miR-106a-5p hsa-miR-20a-5p |
| 2 | GTF2A1   | hsa-miR-25-3p hsa-miR-92a-3p   |
| 2 | GTF2H1   | hsa-miR-15a-5p hsa-miR-16-5p   |
| 2 | H3F3B    | hsa-miR-25-3p hsa-miR-92a-3p   |
| 2 | HAS2     | hsa-miR-106a-5p hsa-miR-20a-5p |
| 2 | HIPK3    | hsa-miR-106a-5p hsa-miR-92a-3p |
| 2 | HMGB3    | hsa-miR-17-5p hsa-miR-20b-5p   |
| 2 | HNRNPA0  | hsa-miR-221-3p hsa-miR-376a-3p |
| 2 | HSDL2    | hsa-miR-15a-5p hsa-miR-16-5p   |
| 2 | HSPA8    | hsa-miR-15b-5p hsa-miR-16-5p   |
| 2 | ICAM1    | hsa-miR-17-3p hsa-miR-221-3p   |
| 2 | INSIG1   | hsa-miR-25-3p hsa-miR-92a-3p   |
| 2 | KDM6B    | hsa-miR-106a-5p hsa-miR-20a-5p |
| 2 | KDSR     | hsa-miR-16-5p hsa-miR-92a-3p   |
| 2 | KHDRBS1  | hsa-miR-877-3p hsa-miR-92a-3p  |
| 2 | KIAA1191 | hsa-miR-106a-5p hsa-miR-20a-5p |
| 2 | KIT      | hsa-miR-221-3p hsa-miR-34a-5p  |
| 2 | KLF3     | hsa-miR-106a-5p hsa-miR-20a-5p |
| 2 | KLF4     | hsa-miR-25-3p hsa-miR-34a-5p   |
| 2 | KLHDC10  | hsa-miR-25-3p hsa-miR-92a-3p   |
| 2 | KLHL28   | hsa-miR-106a-5p hsa-miR-20a-5p |
| 2 | KMT2A    | hsa-miR-16-5p hsa-miR-193a-3p  |
| 2 | LAMC1    | hsa-miR-16-5p hsa-miR-20a-5p   |
| 2 | LARP1    | hsa-miR-16-5p hsa-miR-34a-5p   |
| 2 | LASP1    | hsa-miR-106a-5p hsa-miR-20a-5p |

|   |          |                                 |
|---|----------|---------------------------------|
| 2 | LPGAT1   | hsa-miR-181a-5p hsa-miR-20a-5p  |
| 2 | LRPAP1   | hsa-miR-106a-5p hsa-miR-20a-5p  |
| 2 | LZIC     | hsa-miR-106a-5p hsa-miR-20a-5p  |
| 2 | MAP1B    | hsa-miR-25-3p hsa-miR-411-5p    |
| 2 | MAP2K1   | hsa-miR-181a-5p hsa-miR-34a-5p  |
| 2 | MAP2K4   | hsa-miR-25-3p hsa-miR-92a-3p    |
| 2 | MAP3K2   | hsa-miR-106a-5p hsa-miR-20a-5p  |
| 2 | MAPRE3   | hsa-miR-17-5p hsa-miR-20a-5p    |
| 2 | MAZ      | hsa-miR-149-3p hsa-miR-30b-3p   |
| 2 | MCL1     | hsa-miR-193a-3p hsa-miR-20a-5p  |
| 2 | MED19    | hsa-miR-25-3p hsa-miR-92a-3p    |
| 2 | MEF2D    | hsa-miR-654-5p hsa-miR-92a-3p   |
| 2 | METAP1   | hsa-miR-181a-5p hsa-miR-34a-5p  |
| 2 | MFN1     | hsa-miR-106a-5p hsa-miR-20a-5p  |
| 2 | MKNK2    | hsa-miR-17-5p hsa-miR-20a-5p    |
| 2 | MSMO1    | hsa-miR-106a-5p hsa-miR-20a-5p  |
| 2 | MTF1     | hsa-miR-106a-5p hsa-miR-20a-5p  |
| 2 | MYBL1    | hsa-miR-15a-5p hsa-miR-221-3p   |
| 2 | NAA50    | hsa-miR-20a-5p hsa-miR-766-5p   |
| 2 | NABP1    | hsa-miR-106a-5p hsa-miR-20a-5p  |
| 2 | NCL      | hsa-miR-197-3p hsa-miR-877-3p   |
| 2 | NFATC2IP | hsa-miR-20a-5p hsa-miR-92a-3p   |
| 2 | NUS1     | hsa-miR-197-3p hsa-miR-877-3p   |
| 2 | ORAI2    | hsa-miR-1224-3p hsa-miR-16-5p   |
| 2 | PANK3    | hsa-miR-20a-5p hsa-miR-221-3p   |
| 2 | PAWR     | hsa-miR-25-3p hsa-miR-92a-3p    |
| 2 | PDHX     | hsa-miR-15a-5p hsa-miR-16-5p    |
| 2 | PDZD8    | hsa-miR-25-3p hsa-miR-92a-3p    |
| 2 | PFKP     | hsa-miR-106a-5p hsa-miR-20a-5p  |
| 2 | PGM2L1   | hsa-miR-17-5p hsa-miR-20a-5p    |
| 2 | PIP4K2C  | hsa-miR-20a-5p hsa-miR-877-3p   |
| 2 | PIP5K1C  | hsa-miR-25-3p hsa-miR-92a-3p    |
| 2 | PNRC2    | hsa-miR-181a-5p hsa-miR-374b-3p |
| 2 | POLR3A   | hsa-miR-106a-5p hsa-miR-16-5p   |
| 2 | PPIF     | hsa-miR-16-5p hsa-miR-766-5p    |
| 2 | PPP1R37  | hsa-miR-25-3p hsa-miR-92a-3p    |
| 2 | PPP3R1   | hsa-miR-20a-5p hsa-miR-34a-5p   |
| 2 | PPT1     | hsa-miR-15b-5p hsa-miR-16-5p    |
| 2 | PRKCD    | hsa-miR-15a-5p hsa-miR-16-5p    |
| 2 | PTCD3    | hsa-miR-16-5p hsa-miR-34a-5p    |
| 2 | PTGES2   | hsa-miR-25-3p hsa-miR-92a-3p    |
| 2 | PTGFRN   | hsa-miR-106a-5p hsa-miR-20a-5p  |
| 2 | PTGS2    | hsa-miR-16-5p hsa-miR-181a-5p   |
| 2 | PTPN4    | hsa-miR-106a-5p hsa-miR-20a-5p  |
| 2 | PURB     | hsa-miR-106a-5p hsa-miR-20a-5p  |
| 2 | QSER1    | hsa-miR-7-1-3p hsa-miR-92a-3p   |
| 2 | RAB12    | hsa-miR-16-5p hsa-miR-20a-5p    |
| 2 | RAB15    | hsa-miR-15a-5p hsa-miR-16-5p    |
| 2 | RAB22A   | hsa-miR-106a-5p hsa-miR-20a-5p  |
| 2 | RAB9B    | hsa-miR-15a-5p hsa-miR-16-5p    |
| 2 | RAC1     | hsa-miR-136-5p hsa-miR-574-3p   |
| 2 | RAN      | hsa-miR-106a-5p hsa-miR-20a-5p  |

|   |           |                                 |
|---|-----------|---------------------------------|
| 2 | RB1       | hsa-miR-106a-5p hsa-miR-20a-5p  |
| 2 | RBFOX2    | hsa-miR-432-3p hsa-miR-92a-3p   |
| 2 | RBL2      | hsa-miR-106a-5p hsa-miR-20a-5p  |
| 2 | RBM15B    | hsa-miR-34a-5p hsa-miR-93-3p    |
| 2 | RBM33     | hsa-miR-20a-3p hsa-miR-34a-5p   |
| 2 | REST      | hsa-miR-106a-5p hsa-miR-20a-5p  |
| 2 | RPL27A    | hsa-miR-15b-5p hsa-miR-16-5p    |
| 2 | RPS4X     | hsa-miR-154-5p hsa-miR-16-2-3p  |
| 2 | RSBN1     | hsa-miR-25-3p hsa-miR-92a-3p    |
| 2 | RUFY2     | hsa-miR-106a-5p hsa-miR-20a-5p  |
| 2 | RUNX3     | hsa-miR-106a-5p hsa-miR-20a-5p  |
| 2 | SAR1A     | hsa-miR-34a-5p hsa-miR-34b-3p   |
| 2 | SBNO1     | hsa-miR-15a-5p hsa-miR-19b-1-5p |
| 2 | SCAMP2    | hsa-miR-106a-5p hsa-miR-20a-5p  |
| 2 | SEMA7A    | hsa-miR-106a-5p hsa-miR-20a-5p  |
| 2 | SERTAD3   | hsa-miR-25-3p hsa-miR-92a-3p    |
| 2 | SETD1B    | hsa-miR-16-5p hsa-miR-92a-3p    |
| 2 | SGPP1     | hsa-miR-34a-5p hsa-miR-92a-3p   |
| 2 | SLC1A5    | hsa-miR-15b-5p hsa-miR-16-5p    |
| 2 | SLC25A25  | hsa-miR-181a-5p hsa-miR-877-3p  |
| 2 | SLC30A1   | hsa-miR-106a-5p hsa-miR-20a-5p  |
| 2 | SLC35F5   | hsa-miR-106a-5p hsa-miR-20a-5p  |
| 2 | SLC5A3    | hsa-miR-20a-5p hsa-miR-877-3p   |
| 2 | SLC6A8    | hsa-miR-877-3p hsa-miR-92a-3p   |
| 2 | SLX4      | hsa-miR-25-3p hsa-miR-92a-3p    |
| 2 | SMDT1     | hsa-miR-15a-5p hsa-miR-15b-5p   |
| 2 | SMOC1     | hsa-miR-106a-5p hsa-miR-20a-5p  |
| 2 | SNX6      | hsa-miR-15a-5p hsa-miR-16-5p    |
| 2 | SORT1     | hsa-miR-181a-5p hsa-miR-34a-5p  |
| 2 | SOX5      | hsa-miR-15a-5p hsa-miR-16-5p    |
| 2 | SPCS3     | hsa-miR-16-5p hsa-miR-92a-3p    |
| 2 | SPEN      | hsa-miR-16-5p hsa-miR-877-3p    |
| 2 | SPRYD4    | hsa-miR-25-3p hsa-miR-92a-3p    |
| 2 | SRSF2     | hsa-miR-20a-5p hsa-miR-221-3p   |
| 2 | STAG2     | hsa-miR-136-5p hsa-miR-181a-5p  |
| 2 | SYPL1     | hsa-miR-15a-5p hsa-miR-16-5p    |
| 2 | TEF       | hsa-miR-25-3p hsa-miR-92a-3p    |
| 2 | TET3      | hsa-miR-17-5p hsa-miR-20b-5p    |
| 2 | THBS1     | hsa-miR-411-3p hsa-miR-7-1-3p   |
| 2 | TMEM127   | hsa-miR-106a-5p hsa-miR-20a-5p  |
| 2 | TMEM200C  | hsa-miR-106a-5p hsa-miR-20a-5p  |
| 2 | TMEM43    | hsa-miR-15b-5p hsa-miR-16-5p    |
| 2 | TMEM9B    | hsa-miR-106a-5p hsa-miR-20a-5p  |
| 2 | TMF1      | hsa-miR-32-3p hsa-miR-92a-3p    |
| 2 | TMOD3     | hsa-miR-17-5p hsa-miR-20b-5p    |
| 2 | TNFRSF10B | hsa-miR-106a-5p hsa-miR-20a-5p  |
| 2 | TNFSF9    | hsa-miR-15b-5p hsa-miR-16-5p    |
| 2 | TOB1      | hsa-miR-25-3p hsa-miR-92a-3p    |
| 2 | TSMF      | hsa-miR-25-3p hsa-miR-877-3p    |
| 2 | TSN       | hsa-miR-34a-5p hsa-miR-432-3p   |
| 2 | TULP4     | hsa-miR-25-3p hsa-miR-92a-3p    |
| 2 | UBE2R2    | hsa-miR-92a-3p hsa-miR-93-3p    |

|   |          |                                |
|---|----------|--------------------------------|
| 2 | UBE3C    | hsa-miR-15b-5p hsa-miR-16-5p   |
| 2 | UBFD1    | hsa-miR-16-5p hsa-miR-20a-5p   |
| 2 | UGCG     | hsa-miR-106a-5p hsa-miR-20a-5p |
| 2 | USP15    | hsa-miR-15a-5p hsa-miR-16-5p   |
| 2 | VEGFA    | hsa-miR-15a-5p hsa-miR-16-5p   |
| 2 | VPS4B    | hsa-miR-25-3p hsa-miR-92a-3p   |
| 2 | VPS53    | hsa-miR-221-3p hsa-miR-877-3p  |
| 2 | WASL     | hsa-miR-17-5p hsa-miR-92a-3p   |
| 2 | WDR82    | hsa-miR-17-5p hsa-miR-193a-3p  |
| 2 | WNT3A    | hsa-miR-15a-5p hsa-miR-16-5p   |
| 2 | XRN1     | hsa-miR-34a-5p hsa-miR-92a-3p  |
| 2 | YWHAZ    | hsa-miR-17-5p hsa-miR-20b-5p   |
| 2 | ZBTB4    | hsa-miR-17-5p hsa-miR-20a-5p   |
| 2 | ZDHHC5   | hsa-miR-25-3p hsa-miR-92a-3p   |
| 2 | ZNF202   | hsa-miR-106a-5p hsa-miR-20a-5p |
| 2 | ZNF24    | hsa-miR-25-3p hsa-miR-92a-3p   |
| 2 | ZNF460   | hsa-miR-25-3p hsa-miR-766-3p   |
| 2 | ZNF703   | hsa-miR-550a-3p hsa-miR-92a-3p |
| 2 | ZRANB2   | hsa-miR-16-5p hsa-miR-877-3p   |
| 1 | AGO1     | hsa-miR-34a-5p                 |
| 1 | AAAS     | hsa-miR-16-5p                  |
| 1 | AADAT    | hsa-miR-16-5p                  |
| 1 | AAGAB    | hsa-miR-93-3p                  |
| 1 | AAK1     | hsa-miR-20a-5p                 |
| 1 | ABCA1    | hsa-miR-20a-5p                 |
| 1 | ABCA3    | hsa-miR-20a-5p                 |
| 1 | ABCB7    | hsa-miR-16-5p                  |
| 1 | ABCF3    | hsa-miR-766-3p                 |
| 1 | ABHD10   | hsa-miR-629-3p                 |
| 1 | ACSL3    | hsa-miR-377-5p                 |
| 1 | ACTR1A   | hsa-miR-15a-5p                 |
| 1 | ADNP     | hsa-miR-34a-5p                 |
| 1 | ADO      | hsa-miR-34a-5p                 |
| 1 | AFG3L2   | hsa-miR-16-5p                  |
| 1 | AFTPH    | hsa-miR-181a-5p                |
| 1 | AGK      | hsa-miR-16-5p                  |
| 1 | AGPAT6   | hsa-miR-766-3p                 |
| 1 | AGRN     | hsa-miR-16-5p                  |
| 1 | AHCYL1   | hsa-miR-16-5p                  |
| 1 | AHCYL2   | hsa-miR-16-5p                  |
| 1 | AHR      | hsa-miR-377-5p                 |
| 1 | AIM1     | hsa-miR-34a-5p                 |
| 1 | AKAP10   | hsa-miR-92a-3p                 |
| 1 | AKAP12   | hsa-miR-877-3p                 |
| 1 | ALDH18A1 | hsa-miR-16-5p                  |
| 1 | ALDH2    | hsa-miR-16-5p                  |
| 1 | ALDH9A1  | hsa-miR-20a-5p                 |
| 1 | ALG3     | hsa-miR-16-5p                  |
| 1 | AMER1    | hsa-miR-16-5p                  |
| 1 | AMMECR1L | hsa-miR-15b-5p                 |
| 1 | ANK2     | hsa-miR-877-3p                 |
| 1 | ANKRD17  | hsa-miR-16-5p                  |

|   |          |                 |
|---|----------|-----------------|
| 1 | ANXA1    | hsa-miR-221-3p  |
| 1 | AP1G1    | hsa-miR-20a-5p  |
| 1 | AP2M1    | hsa-miR-16-5p   |
| 1 | APOL2    | hsa-miR-221-3p  |
| 1 | APP      | hsa-miR-16-5p   |
| 1 | APPL1    | hsa-miR-92a-3p  |
| 1 | ARFIP1   | hsa-miR-877-3p  |
| 1 | ARHGDIB  | hsa-miR-34a-5p  |
| 1 | ARIH1    | hsa-miR-16-5p   |
| 1 | ARL1     | hsa-miR-20a-5p  |
| 1 | ARL10    | hsa-miR-16-5p   |
| 1 | ARL2     | hsa-miR-16-5p   |
| 1 | ARL2BP   | hsa-miR-369-3p  |
| 1 | ARL3     | hsa-miR-16-5p   |
| 1 | ARL5B    | hsa-miR-30b-3p  |
| 1 | ARMCX2   | hsa-miR-16-5p   |
| 1 | ARNT     | hsa-miR-221-3p  |
| 1 | ARRDC3   | hsa-miR-877-3p  |
| 1 | ARSJ     | hsa-miR-20a-5p  |
| 1 | ASB1     | hsa-miR-20a-5p  |
| 1 | ASB6     | hsa-miR-16-5p   |
| 1 | ASNSD1   | hsa-miR-15a-5p  |
| 1 | ASXL3    | hsa-miR-221-3p  |
| 1 | ATF7     | hsa-miR-16-5p   |
| 1 | ATG2B    | hsa-miR-20a-5p  |
| 1 | ATL2     | hsa-miR-16-5p   |
| 1 | ATOX1    | hsa-miR-92a-3p  |
| 1 | ATP6V1B2 | hsa-miR-16-5p   |
| 1 | ATP8A2   | hsa-miR-16-5p   |
| 1 | ATP9A    | hsa-miR-377-3p  |
| 1 | ATXN7    | hsa-miR-92a-3p  |
| 1 | AXL      | hsa-miR-34a-5p  |
| 1 | B4GALT3  | hsa-miR-34a-5p  |
| 1 | BAG2     | hsa-miR-181a-5p |
| 1 | BAG3     | hsa-miR-221-3p  |
| 1 | BAG6     | hsa-miR-16-5p   |
| 1 | BAK1     | hsa-miR-92a-3p  |
| 1 | BAMBI    | hsa-miR-20a-5p  |
| 1 | BASP1    | hsa-miR-483-3p  |
| 1 | BAZ2A    | hsa-miR-34a-5p  |
| 1 | BBS10    | hsa-miR-32-3p   |
| 1 | BCAT2    | hsa-miR-92a-3p  |
| 1 | BCL11B   | hsa-miR-25-3p   |
| 1 | BCL2L2   | hsa-miR-221-5p  |
| 1 | BDH2     | hsa-miR-766-3p  |
| 1 | BFAR     | hsa-miR-16-5p   |
| 1 | BIRC5    | hsa-miR-16-5p   |
| 1 | BMP8B    | hsa-miR-20a-5p  |
| 1 | BMPR1A   | hsa-miR-92a-3p  |
| 1 | BNIP3L   | hsa-miR-221-3p  |
| 1 | BRMS1    | hsa-miR-221-5p  |
| 1 | BTF3     | hsa-miR-16-5p   |

|   |          |                |
|---|----------|----------------|
| 1 | BTF3L4   | hsa-miR-20a-5p |
| 1 | BTN3A1   | hsa-miR-20a-5p |
| 1 | BTN3A3   | hsa-miR-20a-5p |
| 1 | BYSL     | hsa-miR-16-5p  |
| 1 | C11orf57 | hsa-miR-92a-3p |
| 1 | C11orf83 | hsa-miR-16-5p  |
| 1 | C16orf70 | hsa-miR-20a-5p |
| 1 | C1orf115 | hsa-miR-877-3p |
| 1 | C1orf43  | hsa-miR-221-5p |
| 1 | C21orf91 | hsa-miR-92a-3p |
| 1 | C2orf47  | hsa-miR-16-5p  |
| 1 | C3       | hsa-miR-766-3p |
| 1 | C5orf28  | hsa-miR-20a-5p |
| 1 | C6orf106 | hsa-miR-16-5p  |
| 1 | C6orf62  | hsa-miR-92a-3p |
| 1 | C7orf60  | hsa-miR-20a-5p |
| 1 | C9orf114 | hsa-miR-16-5p  |
| 1 | C9orf78  | hsa-miR-20a-5p |
| 1 | CAAP1    | hsa-miR-16-5p  |
| 1 | CACNA2D1 | hsa-miR-16-5p  |
| 1 | CAMK2G   | hsa-miR-16-5p  |
| 1 | CAMSAP1  | hsa-miR-15a-5p |
| 1 | CAPN15   | hsa-miR-20a-5p |
| 1 | CAPRIN1  | hsa-miR-16-5p  |
| 1 | CASK     | hsa-miR-16-5p  |
| 1 | CASP2    | hsa-miR-20a-5p |
| 1 | CBFA2T3  | hsa-miR-15a-5p |
| 1 | CBR1     | hsa-miR-93-3p  |
| 1 | CBX8     | hsa-miR-20a-5p |
| 1 | CCDC58   | hsa-miR-16-5p  |
| 1 | CCDC59   | hsa-miR-16-5p  |
| 1 | CCNB1    | hsa-miR-20a-5p |
| 1 | CD69     | hsa-miR-92a-3p |
| 1 | CDAN1    | hsa-miR-34a-5p |
| 1 | CDCP1    | hsa-miR-665    |
| 1 | CDIPT    | hsa-miR-16-5p  |
| 1 | CDK12    | hsa-miR-766-5p |
| 1 | CDK9     | hsa-miR-16-5p  |
| 1 | CDON     | hsa-miR-34a-5p |
| 1 | CERCAM   | hsa-miR-20a-5p |
| 1 | CERS2    | hsa-miR-20a-5p |
| 1 | CFL1     | hsa-miR-34a-5p |
| 1 | CHD9     | hsa-miR-20a-5p |
| 1 | CHORDC1  | hsa-miR-16-5p  |
| 1 | CHP1     | hsa-miR-16-5p  |
| 1 | CHPF     | hsa-miR-15b-5p |
| 1 | CHPT1    | hsa-miR-16-5p  |
| 1 | CHST9    | hsa-miR-92a-3p |
| 1 | CHSY1    | hsa-miR-221-3p |
| 1 | CKAP4    | hsa-miR-877-3p |
| 1 | CLCN3    | hsa-miR-15a-5p |
| 1 | CLCN6    | hsa-miR-15b-5p |

|   |          |                 |
|---|----------|-----------------|
| 1 | CLN8     | hsa-miR-34a-3p  |
| 1 | CLOCK    | hsa-miR-20a-5p  |
| 1 | CLTC     | hsa-miR-16-5p   |
| 1 | COG3     | hsa-miR-92a-3p  |
| 1 | COIL     | hsa-miR-20a-5p  |
| 1 | COPS2    | hsa-miR-181a-5p |
| 1 | CPS1     | hsa-miR-20a-5p  |
| 1 | CPSF6    | hsa-miR-221-3p  |
| 1 | CREB3L2  | hsa-miR-92a-3p  |
| 1 | CRK      | hsa-miR-17-5p   |
| 1 | CROT     | hsa-miR-20a-5p  |
| 1 | CRTC3    | hsa-miR-20a-5p  |
| 1 | CSNK2A1  | hsa-miR-337-3p  |
| 1 | CSTF2T   | hsa-miR-221-3p  |
| 1 | CTSA     | hsa-miR-20a-5p  |
| 1 | CUL2     | hsa-miR-574-3p  |
| 1 | CUX1     | hsa-miR-92a-3p  |
| 1 | CWC22    | hsa-miR-877-3p  |
| 1 | CXorf38  | hsa-miR-34b-5p  |
| 1 | CXXC4    | hsa-miR-30b-3p  |
| 1 | CYB561A3 | hsa-miR-16-5p   |
| 1 | CYB5B    | hsa-miR-34a-5p  |
| 1 | CYBB     | hsa-miR-34a-5p  |
| 1 | CYBRD1   | hsa-miR-20a-5p  |
| 1 | CYP1B1   | hsa-miR-221-3p  |
| 1 | CYP51A1  | hsa-miR-15b-5p  |
| 1 | CYR61    | hsa-miR-20a-3p  |
| 1 | DAB2IP   | hsa-miR-92a-3p  |
| 1 | DBT      | hsa-miR-92a-3p  |
| 1 | DCAF7    | hsa-miR-16-5p   |
| 1 | DCP2     | hsa-miR-92a-3p  |
| 1 | DDAH1    | hsa-miR-34a-5p  |
| 1 | DDX21    | hsa-miR-34a-5p  |
| 1 | DDX52    | hsa-miR-16-5p   |
| 1 | DDX54    | hsa-miR-16-5p   |
| 1 | DENND4B  | hsa-miR-92a-3p  |
| 1 | DENR     | hsa-miR-15b-5p  |
| 1 | DEPDC1   | hsa-miR-17-5p   |
| 1 | DESI1    | hsa-miR-16-5p   |
| 1 | DHCR7    | hsa-miR-34a-5p  |
| 1 | DHFR     | hsa-miR-15b-5p  |
| 1 | DHX30    | hsa-miR-16-5p   |
| 1 | DHX35    | hsa-miR-16-5p   |
| 1 | DHX36    | hsa-miR-16-5p   |
| 1 | DHX8     | hsa-miR-16-5p   |
| 1 | DICER1   | hsa-miR-221-3p  |
| 1 | DKC1     | hsa-miR-16-5p   |
| 1 | DKK2     | hsa-miR-221-3p  |
| 1 | DLK1     | hsa-miR-15a-5p  |
| 1 | DLL1     | hsa-miR-34a-5p  |
| 1 | DMAP1    | hsa-miR-16-5p   |
| 1 | DNAJA2   | hsa-miR-16-5p   |

|   |          |                |
|---|----------|----------------|
| 1 | DNAJA4   | hsa-miR-16-5p  |
| 1 | DNAJB12  | hsa-miR-92a-3p |
| 1 | DNAJB4   | hsa-miR-16-5p  |
| 1 | DNLZ     | hsa-miR-197-3p |
| 1 | DSG2     | hsa-miR-15b-5p |
| 1 | DSTYK    | hsa-miR-15a-5p |
| 1 | DTYMK    | hsa-miR-34a-5p |
| 1 | E2F4     | hsa-miR-377-5p |
| 1 | E2F5     | hsa-miR-34a-5p |
| 1 | EARS2    | hsa-miR-92a-3p |
| 1 | EDEM3    | hsa-miR-34a-5p |
| 1 | EEF1A1   | hsa-miR-16-5p  |
| 1 | EFHD2    | hsa-miR-34a-5p |
| 1 | EFNB1    | hsa-miR-34a-5p |
| 1 | EFNB2    | hsa-miR-16-5p  |
| 1 | EGFL7    | hsa-miR-126-3p |
| 1 | EGFR     | hsa-miR-16-5p  |
| 1 | EHBP1    | hsa-miR-92a-3p |
| 1 | EHD2     | hsa-miR-197-3p |
| 1 | EIF1AD   | hsa-miR-877-3p |
| 1 | EIF1AX   | hsa-miR-17-3p  |
| 1 | EIF2AK2  | hsa-miR-15b-5p |
| 1 | EIF2B2   | hsa-miR-16-5p  |
| 1 | EIF3A    | hsa-miR-16-5p  |
| 1 | EIF3C    | hsa-miR-16-5p  |
| 1 | EIF3CL   | hsa-miR-16-5p  |
| 1 | EIF4A2   | hsa-miR-20a-5p |
| 1 | EIF4B    | hsa-miR-16-5p  |
| 1 | EIF4EBP1 | hsa-miR-93-3p  |
| 1 | EIF4EBP2 | hsa-miR-877-3p |
| 1 | EIF4H    | hsa-miR-93-3p  |
| 1 | EIF5A2   | hsa-miR-20a-5p |
| 1 | ELAVL2   | hsa-miR-221-3p |
| 1 | ELL2     | hsa-miR-15b-3p |
| 1 | ELOVL1   | hsa-miR-16-5p  |
| 1 | ELOVL2   | hsa-miR-17-3p  |
| 1 | ELOVL5   | hsa-miR-16-5p  |
| 1 | ELOVL6   | hsa-miR-766-3p |
| 1 | EMC1     | hsa-miR-766-3p |
| 1 | EML4     | hsa-miR-16-5p  |
| 1 | EMP1     | hsa-miR-34a-5p |
| 1 | ENPP4    | hsa-miR-16-5p  |
| 1 | ENTPD6   | hsa-miR-16-5p  |
| 1 | EPB41L4B | hsa-miR-7-1-3p |
| 1 | EPHA2    | hsa-miR-34a-5p |
| 1 | EPT1     | hsa-miR-16-5p  |
| 1 | ERBB2IP  | hsa-miR-877-3p |
| 1 | ESR1     | hsa-miR-221-3p |
| 1 | ETS1     | hsa-miR-221-3p |
| 1 | EVI5L    | hsa-miR-34a-5p |
| 1 | EXPH5    | hsa-miR-877-3p |
| 1 | FAF1     | hsa-miR-92a-3p |



|   |         |                 |
|---|---------|-----------------|
| 1 | FAH     | hsa-miR-34a-5p  |
| 1 | FAM102A | hsa-miR-20a-5p  |
| 1 | FAM104A | hsa-miR-34a-5p  |
| 1 | FAM115A | hsa-miR-877-3p  |
| 1 | FAM117B | hsa-miR-20a-5p  |
| 1 | FAM122B | hsa-miR-877-3p  |
| 1 | FAM126B | hsa-miR-92a-3p  |
| 1 | FAM127A | hsa-miR-766-3p  |
| 1 | FAM129B | hsa-miR-16-5p   |
| 1 | FAM155B | hsa-miR-16-5p   |
| 1 | FAM168A | hsa-miR-16-5p   |
| 1 | FAM168B | hsa-miR-92a-3p  |
| 1 | FAM208A | hsa-miR-34a-5p  |
| 1 | FAM20C  | hsa-miR-92a-3p  |
| 1 | FAM3C   | hsa-miR-34a-5p  |
| 1 | FAM46C  | hsa-miR-20a-5p  |
| 1 | FAM83D  | hsa-miR-20a-5p  |
| 1 | FAM98A  | hsa-miR-17-3p   |
| 1 | FAR1    | hsa-miR-93-3p   |
| 1 | FASTKD2 | hsa-miR-16-5p   |
| 1 | FAT2    | hsa-miR-16-5p   |
| 1 | FBXO33  | hsa-miR-181a-5p |
| 1 | FBXO41  | hsa-miR-16-5p   |
| 1 | FBXO48  | hsa-miR-20a-5p  |
| 1 | FECH    | hsa-miR-16-5p   |
| 1 | FEN1    | hsa-miR-885-5p  |
| 1 | FGFR1OP | hsa-miR-20a-5p  |
| 1 | FKBP4   | hsa-miR-877-3p  |
| 1 | FKBP5   | hsa-miR-93-3p   |
| 1 | FMNL3   | hsa-miR-20a-5p  |
| 1 | FOPNL   | hsa-miR-92a-3p  |
| 1 | FOSL1   | hsa-miR-34a-5p  |
| 1 | FOXK2   | hsa-miR-20a-5p  |
| 1 | FOXN3   | hsa-miR-34a-5p  |
| 1 | FOXO3   | hsa-miR-197-3p  |
| 1 | FOXRED2 | hsa-miR-20a-5p  |
| 1 | FRMD6   | hsa-miR-20a-5p  |
| 1 | FUT10   | hsa-miR-34a-5p  |
| 1 | G3BP1   | hsa-miR-197-3p  |
| 1 | GABPA   | hsa-miR-92a-3p  |
| 1 | GALNT3  | hsa-miR-221-3p  |
| 1 | GAPDH   | hsa-miR-877-3p  |
| 1 | GAS1    | hsa-miR-34a-5p  |
| 1 | GCC1    | hsa-miR-17-3p   |
| 1 | GLRX5   | hsa-miR-15b-3p  |
| 1 | GNB1    | hsa-miR-16-5p   |
| 1 | GNPDA1  | hsa-miR-34a-5p  |
| 1 | GNS     | hsa-miR-20a-5p  |
| 1 | GOLGA4  | hsa-miR-92a-3p  |
| 1 | GOLIM4  | hsa-miR-877-3p  |
| 1 | GOLT1B  | hsa-miR-16-5p   |
| 1 | GORASP2 | hsa-miR-34a-5p  |

|   |           |                 |
|---|-----------|-----------------|
| 1 | GOT2      | hsa-miR-16-5p   |
| 1 | GPATCH11  | hsa-miR-20a-5p  |
| 1 | GPATCH2L  | hsa-miR-629-3p  |
| 1 | GPATCH4   | hsa-miR-16-5p   |
| 1 | GPR107    | hsa-miR-221-3p  |
| 1 | GPR157    | hsa-miR-16-5p   |
| 1 | GPR180    | hsa-miR-16-5p   |
| 1 | GPR27     | hsa-miR-16-5p   |
| 1 | GPR55     | hsa-miR-16-5p   |
| 1 | GPR83     | hsa-miR-181a-5p |
| 1 | GPX2      | hsa-miR-17-3p   |
| 1 | GRAMD1B   | hsa-miR-92a-3p  |
| 1 | GREB1     | hsa-miR-885-5p  |
| 1 | GTF2E1    | hsa-miR-221-3p  |
| 1 | GTF2H3    | hsa-miR-20a-5p  |
| 1 | GTF3C2    | hsa-miR-16-5p   |
| 1 | GTF3C3    | hsa-miR-16-5p   |
| 1 | GTF3C4    | hsa-miR-16-5p   |
| 1 | GTPBP8    | hsa-miR-16-5p   |
| 1 | GXYLT1    | hsa-miR-92a-3p  |
| 1 | GYG1      | hsa-miR-34a-5p  |
| 1 | H2AFV     | hsa-miR-136-5p  |
| 1 | H2AFX     | hsa-miR-663a    |
| 1 | H3F3C     | hsa-miR-92a-3p  |
| 1 | HAUS3     | hsa-miR-16-5p   |
| 1 | HDAC1     | hsa-miR-34a-5p  |
| 1 | HDLBP     | hsa-miR-34a-5p  |
| 1 | HEATR1    | hsa-miR-16-5p   |
| 1 | HEATR2    | hsa-miR-16-5p   |
| 1 | HEATR6    | hsa-miR-92a-3p  |
| 1 | HECTD2    | hsa-miR-221-3p  |
| 1 | HEXIM1    | hsa-miR-17-3p   |
| 1 | HEYL      | hsa-miR-93-3p   |
| 1 | HIAT1     | hsa-miR-20a-3p  |
| 1 | HIGD1A    | hsa-miR-16-5p   |
| 1 | HIRIP3    | hsa-miR-877-3p  |
| 1 | HIST1H4B  | hsa-miR-34a-5p  |
| 1 | HIST1H4E  | hsa-miR-34a-5p  |
| 1 | HIST1H4H  | hsa-miR-34a-5p  |
| 1 | HIST2H2BE | hsa-miR-16-5p   |
| 1 | HIST4H4   | hsa-miR-34a-5p  |
| 1 | HLA-A     | hsa-miR-149-3p  |
| 1 | HMBOX1    | hsa-miR-7-1-3p  |
| 1 | HMGB2     | hsa-miR-20a-3p  |
| 1 | HMGCR     | hsa-miR-92a-3p  |
| 1 | HNRNPA1   | hsa-miR-221-5p  |
| 1 | HNRNPDL   | hsa-miR-16-5p   |
| 1 | HOXA13    | hsa-miR-34a-5p  |
| 1 | HOXB8     | hsa-miR-34a-5p  |
| 1 | HOXC10    | hsa-miR-221-3p  |
| 1 | HOXC4     | hsa-miR-30b-3p  |
| 1 | HOXC8     | hsa-miR-92a-3p  |

|   |          |                 |
|---|----------|-----------------|
| 1 | HSD17B10 | hsa-miR-34a-5p  |
| 1 | HSPA13   | hsa-miR-34a-5p  |
| 1 | HSPA4    | hsa-miR-197-3p  |
| 1 | HSPA4L   | hsa-miR-16-5p   |
| 1 | HSPA5    | hsa-miR-16-5p   |
| 1 | HTT      | hsa-miR-16-5p   |
| 1 | IARS     | hsa-miR-16-5p   |
| 1 | IARS2    | hsa-miR-197-3p  |
| 1 | IER3     | hsa-miR-20a-5p  |
| 1 | IFNAR1   | hsa-miR-20a-5p  |
| 1 | IFNG     | hsa-miR-409-3p  |
| 1 | IFNLR1   | hsa-miR-34b-5p  |
| 1 | IGF2BP1  | hsa-miR-877-3p  |
| 1 | IGF2BP3  | hsa-miR-34a-5p  |
| 1 | IGF2R    | hsa-miR-16-5p   |
| 1 | IKBKG    | hsa-miR-15a-5p  |
| 1 | IKZF2    | hsa-miR-92a-3p  |
| 1 | IKZF5    | hsa-miR-20a-5p  |
| 1 | IL6R     | hsa-miR-34a-5p  |
| 1 | IMPA1    | hsa-miR-34a-5p  |
| 1 | INCENP   | hsa-miR-181a-5p |
| 1 | INHBB    | hsa-miR-34a-5p  |
| 1 | INPP5F   | hsa-miR-17-5p   |
| 1 | IPMK     | hsa-miR-20b-3p  |
| 1 | IPO7     | hsa-miR-16-5p   |
| 1 | IQGAP1   | hsa-miR-136-3p  |
| 1 | IRS1     | hsa-miR-126-3p  |
| 1 | IRS4     | hsa-miR-16-5p   |
| 1 | ITGA2    | hsa-miR-15a-5p  |
| 1 | ITGA3    | hsa-let-7b-3p   |
| 1 | ITGA5    | hsa-miR-92a-3p  |
| 1 | ITGB8    | hsa-miR-20a-5p  |
| 1 | ITM2B    | hsa-miR-25-3p   |
| 1 | JAG1     | hsa-miR-34a-5p  |
| 1 | JAK1     | hsa-miR-20a-5p  |
| 1 | JAK2     | hsa-miR-16-5p   |
| 1 | JUNB     | hsa-miR-663a    |
| 1 | KAT6A    | hsa-miR-877-3p  |
| 1 | KBTBD6   | hsa-miR-34a-5p  |
| 1 | KBTBD7   | hsa-miR-877-3p  |
| 1 | KCNB1    | hsa-miR-106a-5p |
| 1 | KCNC4    | hsa-miR-16-5p   |
| 1 | KCNN4    | hsa-miR-16-5p   |
| 1 | KCTD7    | hsa-miR-92a-3p  |
| 1 | KDM2A    | hsa-miR-16-5p   |
| 1 | KDR      | hsa-miR-16-5p   |
| 1 | KHNYN    | hsa-miR-877-3p  |
| 1 | KIAA0226 | hsa-miR-16-5p   |
| 1 | KIAA0368 | hsa-miR-16-5p   |
| 1 | KIAA0754 | hsa-miR-877-3p  |
| 1 | KIAA1432 | hsa-miR-16-5p   |
| 1 | KIAA2013 | hsa-miR-16-5p   |

|   |          |                  |
|---|----------|------------------|
| 1 | KIF11    | hsa-miR-34a-5p   |
| 1 | KIF14    | hsa-miR-16-5p    |
| 1 | KIF16B   | hsa-miR-221-3p   |
| 1 | KIF1B    | hsa-miR-16-5p    |
| 1 | KIF2A    | hsa-miR-16-5p    |
| 1 | KIF2C    | hsa-miR-16-5p    |
| 1 | KIF3B    | hsa-miR-16-5p    |
| 1 | KIF5A    | hsa-miR-16-5p    |
| 1 | KLF10    | hsa-miR-197-3p   |
| 1 | KLF2     | hsa-miR-92a-3p   |
| 1 | KLHL20   | hsa-miR-20a-5p   |
| 1 | KLHL3    | hsa-miR-92a-3p   |
| 1 | KLHL42   | hsa-miR-92a-3p   |
| 1 | KPNA3    | hsa-miR-16-5p    |
| 1 | KPNA5    | hsa-miR-197-3p   |
| 1 | KRAS     | hsa-miR-16-5p    |
| 1 | KRT10    | hsa-miR-20a-5p   |
| 1 | L1CAM    | hsa-miR-16-5p    |
| 1 | LAMB1    | hsa-miR-16-5p    |
| 1 | LARP4    | hsa-miR-16-5p    |
| 1 | LATS1    | hsa-miR-16-5p    |
| 1 | LATS2    | hsa-miR-25-3p    |
| 1 | LCOR     | hsa-miR-92a-3p   |
| 1 | LDHA     | hsa-miR-34a-5p   |
| 1 | LDOC1    | hsa-miR-221-5p   |
| 1 | LGALS8   | hsa-miR-136-5p   |
| 1 | LIG4     | hsa-miR-16-5p    |
| 1 | LLPH     | hsa-miR-34a-5p   |
| 1 | LMAN1    | hsa-miR-34a-3p   |
| 1 | LMF2     | hsa-miR-16-5p    |
| 1 | LMNB1    | hsa-miR-15a-3p   |
| 1 | LMO7     | hsa-miR-16-5p    |
| 1 | LPHN1    | hsa-miR-16-5p    |
| 1 | LRP6     | hsa-miR-221-3p   |
| 1 | LRRC40   | hsa-miR-34a-5p   |
| 1 | LRRFIP1  | hsa-miR-877-3p   |
| 1 | LURAP1L  | hsa-miR-15a-5p   |
| 1 | LYPLA2   | hsa-miR-16-5p    |
| 1 | LYRM2    | hsa-miR-193a-3p  |
| 1 | LYSMD1   | hsa-miR-221-3p   |
| 1 | MAGEA3   | hsa-miR-34a-5p   |
| 1 | MAGEA6   | hsa-miR-34a-5p   |
| 1 | MAK16    | hsa-miR-20a-5p   |
| 1 | MAN2A1   | hsa-miR-92a-3p   |
| 1 | MAP3K1   | hsa-miR-193a-3p  |
| 1 | MAP3K10  | hsa-miR-181a-5p  |
| 1 | MAP3K5   | hsa-miR-20a-5p   |
| 1 | MAP3K9   | hsa-miR-17-5p    |
| 1 | MAPK6    | hsa-miR-19b-1-5p |
| 1 | MAPK9    | hsa-miR-20a-5p   |
| 1 | MAPKAPK2 | hsa-miR-483-3p   |
| 1 | MAPRE1   | hsa-miR-93-3p    |

|   |         |                |
|---|---------|----------------|
| 1 | MAVS    | hsa-miR-20a-5p |
| 1 | MBD3    | hsa-miR-766-3p |
| 1 | MBD6    | hsa-miR-34a-5p |
| 1 | MBNL2   | hsa-miR-369-3p |
| 1 | MCM2    | hsa-miR-34a-5p |
| 1 | MCU     | hsa-miR-16-5p  |
| 1 | MDM4    | hsa-miR-34a-5p |
| 1 | MDN1    | hsa-miR-16-5p  |
| 1 | MED10   | hsa-miR-543    |
| 1 | MED13   | hsa-miR-16-5p  |
| 1 | MED17   | hsa-miR-20a-5p |
| 1 | MEGF9   | hsa-miR-197-3p |
| 1 | MEPCE   | hsa-miR-16-5p  |
| 1 | MESDC2  | hsa-miR-15b-5p |
| 1 | MET     | hsa-miR-34a-5p |
| 1 | MFSD8   | hsa-miR-20a-5p |
| 1 | MIA3    | hsa-miR-92a-3p |
| 1 | MKRN1   | hsa-miR-20a-5p |
| 1 | MKRN2   | hsa-miR-92a-3p |
| 1 | MLXIP   | hsa-miR-20a-5p |
| 1 | MMP2    | hsa-miR-17-5p  |
| 1 | MORF4L2 | hsa-miR-20a-5p |
| 1 | MRPS10  | hsa-miR-16-5p  |
| 1 | MRPS2   | hsa-miR-16-5p  |
| 1 | MRPS23  | hsa-miR-16-5p  |
| 1 | MRPS25  | hsa-miR-16-5p  |
| 1 | MSL2    | hsa-miR-136-5p |
| 1 | MSL3    | hsa-miR-16-5p  |
| 1 | MTA2    | hsa-miR-34a-5p |
| 1 | MTAP    | hsa-miR-34a-5p |
| 1 | MTDH    | hsa-miR-34a-5p |
| 1 | MTMR1   | hsa-miR-92a-3p |
| 1 | MTMR4   | hsa-miR-15b-5p |
| 1 | MTMR9   | hsa-miR-34a-5p |
| 1 | MTOR    | hsa-miR-16-5p  |
| 1 | MTPN    | hsa-miR-20a-3p |
| 1 | MXI1    | hsa-miR-20a-5p |
| 1 | MYH14   | hsa-miR-877-3p |
| 1 | MYO1C   | hsa-miR-34a-5p |
| 1 | MYO6    | hsa-miR-92a-3p |
| 1 | NAA30   | hsa-miR-15b-5p |
| 1 | NAB1    | hsa-miR-92a-3p |
| 1 | NACC2   | hsa-miR-92a-3p |
| 1 | NAP1L1  | hsa-miR-877-3p |
| 1 | NARF    | hsa-miR-16-5p  |
| 1 | NARS    | hsa-miR-20a-5p |
| 1 | NARS2   | hsa-miR-16-5p  |
| 1 | NCOA1   | hsa-miR-34a-5p |
| 1 | NCOA3   | hsa-miR-20a-5p |
| 1 | NEMF    | hsa-miR-16-5p  |
| 1 | NFIC    | hsa-miR-16-5p  |
| 1 | NFKB1   | hsa-miR-16-5p  |

|   |             |                 |
|---|-------------|-----------------|
| 1 | NHLRC3      | hsa-miR-20a-5p  |
| 1 | NNT         | hsa-miR-16-5p   |
| 1 | NOA1        | hsa-miR-197-3p  |
| 1 | NOTCH1      | hsa-miR-34a-5p  |
| 1 | NPAT        | hsa-miR-20a-5p  |
| 1 | NPM1        | hsa-miR-15b-5p  |
| 1 | NPNT        | hsa-miR-106a-5p |
| 1 | NPR3        | hsa-miR-16-5p   |
| 1 | NPTN        | hsa-miR-92a-3p  |
| 1 | NR6A1       | hsa-miR-15a-3p  |
| 1 | NRXN3       | hsa-miR-92a-3p  |
| 1 | NUDT12      | hsa-miR-181a-5p |
| 1 | NUP155      | hsa-miR-92a-3p  |
| 1 | NUP210      | hsa-miR-15b-5p  |
| 1 | ODC1        | hsa-miR-15a-5p  |
| 1 | OLA1        | hsa-miR-877-3p  |
| 1 | ONECUT2     | hsa-miR-16-5p   |
| 1 | OTUD4       | hsa-miR-20a-5p  |
| 1 | P4HA1       | hsa-miR-877-3p  |
| 1 | PA2G4       | hsa-miR-16-5p   |
| 1 | PABPN1      | hsa-miR-629-3p  |
| 1 | PALM2-AKAP2 | hsa-miR-629-3p  |
| 1 | PANX1       | hsa-miR-16-5p   |
| 1 | PAQR5       | hsa-miR-20a-5p  |
| 1 | PARD6B      | hsa-miR-20a-5p  |
| 1 | PARP4       | hsa-miR-877-3p  |
| 1 | PAX9        | hsa-miR-92a-3p  |
| 1 | PBXIP1      | hsa-miR-20a-5p  |
| 1 | PCGF5       | hsa-miR-92a-3p  |
| 1 | PCMT1       | hsa-miR-16-5p   |
| 1 | PCMTD1      | hsa-miR-92a-3p  |
| 1 | PCNX        | hsa-miR-17-5p   |
| 1 | PDGFRA      | hsa-miR-34a-5p  |
| 1 | PDIK1L      | hsa-miR-15b-5p  |
| 1 | PDPK1       | hsa-miR-20a-5p  |
| 1 | PDRG1       | hsa-miR-106a-5p |
| 1 | PDZD11      | hsa-miR-20a-5p  |
| 1 | PEA15       | hsa-miR-34a-5p  |
| 1 | PERP        | hsa-miR-629-3p  |
| 1 | PGK1        | hsa-miR-20a-5p  |
| 1 | PHACTR4     | hsa-miR-30b-3p  |
| 1 | PHF12       | hsa-miR-30b-3p  |
| 1 | PHF19       | hsa-miR-34a-5p  |
| 1 | PHF6        | hsa-miR-20a-5p  |
| 1 | PHIP        | hsa-miR-16-5p   |
| 1 | PHLDA2      | hsa-miR-193a-3p |
| 1 | PIM1        | hsa-miR-15b-5p  |
| 1 | PIP4K2A     | hsa-miR-20a-5p  |
| 1 | PITPNA      | hsa-miR-92a-3p  |
| 1 | PKD2        | hsa-miR-17-5p   |
| 1 | PKP2        | hsa-miR-34a-5p  |
| 1 | PLAGL2      | hsa-miR-766-3p  |

|   |         |                 |
|---|---------|-----------------|
| 1 | PLCG1   | hsa-miR-34a-5p  |
| 1 | PLCL2   | hsa-miR-181a-5p |
| 1 | PLEC    | hsa-miR-16-5p   |
| 1 | PLEKHO2 | hsa-miR-20a-5p  |
| 1 | PLK2    | hsa-miR-126-3p  |
| 1 | PLRG1   | hsa-miR-16-5p   |
| 1 | PLXNA1  | hsa-miR-20a-5p  |
| 1 | PMAIP1  | hsa-miR-197-3p  |
| 1 | PNP     | hsa-miR-16-5p   |
| 1 | POFUT1  | hsa-miR-16-5p   |
| 1 | POGK    | hsa-miR-17-5p   |
| 1 | POGZ    | hsa-miR-34a-5p  |
| 1 | POLE4   | hsa-miR-15a-5p  |
| 1 | POM121  | hsa-miR-877-3p  |
| 1 | POU3F2  | hsa-miR-221-3p  |
| 1 | PPP1R10 | hsa-miR-34a-5p  |
| 1 | PPP1R3B | hsa-miR-20a-5p  |
| 1 | PPP2R1A | hsa-miR-16-5p   |
| 1 | PPP2R1B | hsa-miR-16-5p   |
| 1 | PPP2R5E | hsa-miR-181a-5p |
| 1 | PRKAB2  | hsa-miR-16-5p   |
| 1 | PRKAR1A | hsa-miR-16-5p   |
| 1 | PRLR    | hsa-miR-181a-5p |
| 1 | PRPF38B | hsa-miR-877-3p  |
| 1 | PRPF4   | hsa-miR-20a-5p  |
| 1 | PRR12   | hsa-miR-766-5p  |
| 1 | PRR3    | hsa-miR-34a-5p  |
| 1 | PRRC2C  | hsa-miR-16-5p   |
| 1 | PSAP    | hsa-miR-377-3p  |
| 1 | PSMC2   | hsa-miR-16-5p   |
| 1 | PSMD11  | hsa-miR-766-5p  |
| 1 | PSMD5   | hsa-miR-92a-3p  |
| 1 | PSME4   | hsa-miR-16-5p   |
| 1 | PTBP1   | hsa-miR-17-3p   |
| 1 | PTGER4  | hsa-miR-92a-3p  |
| 1 | PTPLAD1 | hsa-miR-20a-3p  |
| 1 | PTPN3   | hsa-miR-16-5p   |
| 1 | PUM1    | hsa-miR-181a-5p |
| 1 | PVR     | hsa-miR-16-5p   |
| 1 | PXDN    | hsa-miR-377-3p  |
| 1 | PYGB    | hsa-miR-34a-5p  |
| 1 | QSOX2   | hsa-miR-17-3p   |
| 1 | RAB10   | hsa-miR-20a-5p  |
| 1 | RAB1A   | hsa-miR-16-5p   |
| 1 | RAB2B   | hsa-miR-181a-5p |
| 1 | RAB8B   | hsa-miR-92a-3p  |
| 1 | RAD21   | hsa-miR-92a-3p  |
| 1 | RAE1    | hsa-miR-34a-5p  |
| 1 | RANGAP1 | hsa-miR-16-5p   |
| 1 | RAP1A   | hsa-miR-337-3p  |
| 1 | RAP2C   | hsa-miR-20a-5p  |
| 1 | RAPGEF6 | hsa-miR-766-3p  |

|   |         |                 |
|---|---------|-----------------|
| 1 | RASEF   | hsa-miR-15a-5p  |
| 1 | RASL10B | hsa-miR-877-3p  |
| 1 | RASSF2  | hsa-miR-16-5p   |
| 1 | RBBP7   | hsa-miR-20a-5p  |
| 1 | RBCK1   | hsa-miR-34a-5p  |
| 1 | RBL1    | hsa-miR-20a-5p  |
| 1 | RBM12   | hsa-miR-34a-5p  |
| 1 | RBM12B  | hsa-miR-20a-5p  |
| 1 | RBMS1   | hsa-miR-16-5p   |
| 1 | RBMS3   | hsa-miR-16-5p   |
| 1 | RCCD1   | hsa-miR-20a-5p  |
| 1 | RCL1    | hsa-miR-16-5p   |
| 1 | RDH11   | hsa-miR-34a-5p  |
| 1 | REEP5   | hsa-miR-20a-5p  |
| 1 | RET     | hsa-miR-15a-5p  |
| 1 | REXO1   | hsa-miR-92a-3p  |
| 1 | RFC3    | hsa-miR-20a-5p  |
| 1 | RFFL    | hsa-miR-92a-3p  |
| 1 | RFT1    | hsa-miR-16-5p   |
| 1 | RFX1    | hsa-miR-197-3p  |
| 1 | RGP1    | hsa-miR-34a-5p  |
| 1 | RGS3    | hsa-miR-126-3p  |
| 1 | RIMS3   | hsa-miR-16-5p   |
| 1 | RLF     | hsa-miR-181a-5p |
| 1 | RNF11   | hsa-miR-17-3p   |
| 1 | RNF111  | hsa-miR-16-5p   |
| 1 | RNF144B | hsa-miR-16-5p   |
| 1 | RNF219  | hsa-miR-16-2-3p |
| 1 | RNF34   | hsa-miR-20a-5p  |
| 1 | RNF40   | hsa-miR-34a-5p  |
| 1 | RP2     | hsa-miR-92a-3p  |
| 1 | RPA2    | hsa-miR-20a-5p  |
| 1 | RPIA    | hsa-miR-34a-5p  |
| 1 | RPL13   | hsa-miR-16-5p   |
| 1 | RPL13A  | hsa-miR-877-3p  |
| 1 | RPL28   | hsa-miR-766-3p  |
| 1 | RPL37A  | hsa-miR-15a-3p  |
| 1 | RPL5    | hsa-miR-16-5p   |
| 1 | RPL7A   | hsa-miR-197-3p  |
| 1 | RPRD1B  | hsa-miR-16-5p   |
| 1 | RPS16   | hsa-let-7b-3p   |
| 1 | RPS17   | hsa-miR-16-5p   |
| 1 | RPS24   | hsa-miR-92a-3p  |
| 1 | RPS27   | hsa-miR-16-5p   |
| 1 | RRAS    | hsa-miR-34a-5p  |
| 1 | RRAS2   | hsa-miR-20a-5p  |
| 1 | RRM2    | hsa-miR-20a-5p  |
| 1 | RSRC2   | hsa-miR-197-3p  |
| 1 | S1PR3   | hsa-miR-766-3p  |
| 1 | SART1   | hsa-miR-16-5p   |
| 1 | SBNO2   | hsa-miR-25-3p   |
| 1 | SCAF4   | hsa-miR-16-5p   |



|   |           |                 |
|---|-----------|-----------------|
| 1 | SCAMP3    | hsa-miR-16-5p   |
| 1 | SCCPDH    | hsa-miR-15b-5p  |
| 1 | SCD       | hsa-miR-20a-5p  |
| 1 | SDC2      | hsa-miR-7-1-3p  |
| 1 | SDE2      | hsa-miR-34a-3p  |
| 1 | SDHAF2    | hsa-miR-16-5p   |
| 1 | SEC23A    | hsa-miR-20a-5p  |
| 1 | SEC24A    | hsa-miR-16-5p   |
| 1 | SEC61A1   | hsa-miR-16-5p   |
| 1 | SEC61A2   | hsa-miR-16-5p   |
| 1 | SECISBP2L | hsa-miR-647     |
| 1 | SERBP1    | hsa-miR-16-5p   |
| 1 | SERINC1   | hsa-miR-106a-5p |
| 1 | SESN1     | hsa-miR-377-3p  |
| 1 | SF1       | hsa-miR-17-3p   |
| 1 | SF3A3     | hsa-miR-16-5p   |
| 1 | SFXN1     | hsa-miR-16-5p   |
| 1 | SGPL1     | hsa-miR-20a-5p  |
| 1 | SH3PXD2A  | hsa-miR-92a-3p  |
| 1 | SIK2      | hsa-miR-181a-5p |
| 1 | SIKE1     | hsa-miR-20a-5p  |
| 1 | SIPA1L2   | hsa-miR-16-5p   |
| 1 | SIRT1     | hsa-miR-34a-5p  |
| 1 | SIX4      | hsa-miR-885-5p  |
| 1 | SLAIN2    | hsa-miR-20a-5p  |
| 1 | SLC12A2   | hsa-miR-16-5p   |
| 1 | SLC12A7   | hsa-miR-766-3p  |
| 1 | SLC16A2   | hsa-miR-17-5p   |
| 1 | SLC16A3   | hsa-miR-16-5p   |
| 1 | SLC1A1    | hsa-miR-629-3p  |
| 1 | SLC20A1   | hsa-miR-379-5p  |
| 1 | SLC25A28  | hsa-miR-20a-5p  |
| 1 | SLC25A37  | hsa-miR-17-5p   |
| 1 | SLC30A7   | hsa-miR-106a-5p |
| 1 | SLC35A4   | hsa-miR-16-5p   |
| 1 | SLC35G2   | hsa-miR-34a-5p  |
| 1 | SLC38A7   | hsa-miR-30b-3p  |
| 1 | SLC39A14  | hsa-miR-16-5p   |
| 1 | SLC7A1    | hsa-miR-16-5p   |
| 1 | SLITRK1   | hsa-miR-24-1-5p |
| 1 | SLK       | hsa-miR-20a-5p  |
| 1 | SMAD3     | hsa-miR-16-5p   |
| 1 | SMARCA5   | hsa-miR-25-3p   |
| 1 | SMARCC1   | hsa-miR-34a-5p  |
| 1 | SMC1A     | hsa-miR-93-3p   |
| 1 | SMEK2     | hsa-miR-16-5p   |
| 1 | SMIM13    | hsa-miR-20a-5p  |
| 1 | SMS       | hsa-miR-7-1-3p  |
| 1 | SMU1      | hsa-miR-766-3p  |
| 1 | SNAI1     | hsa-miR-34a-5p  |
| 1 | SNAI2     | hsa-miR-181a-5p |
| 1 | SNN       | hsa-miR-92a-3p  |

|   |          |                 |
|---|----------|-----------------|
| 1 | SNRNP200 | hsa-miR-877-3p  |
| 1 | SNRPB2   | hsa-miR-16-5p   |
| 1 | SNRPC    | hsa-miR-16-5p   |
| 1 | SNX12    | hsa-miR-16-5p   |
| 1 | SOCS4    | hsa-miR-34a-5p  |
| 1 | SOCS5    | hsa-miR-20a-5p  |
| 1 | SOD1     | hsa-miR-377-3p  |
| 1 | SON      | hsa-miR-16-5p   |
| 1 | SOWAHC   | hsa-miR-16-5p   |
| 1 | SOX11    | hsa-miR-197-3p  |
| 1 | SOX2     | hsa-miR-126-3p  |
| 1 | SP1      | hsa-miR-16-5p   |
| 1 | SPATA2   | hsa-miR-16-5p   |
| 1 | SPOPL    | hsa-miR-20a-5p  |
| 1 | SPRYD3   | hsa-miR-16-5p   |
| 1 | SPTAN1   | hsa-miR-93-3p   |
| 1 | SPTSSA   | hsa-miR-221-3p  |
| 1 | SRC      | hsa-miR-34a-5p  |
| 1 | SREK1IP1 | hsa-miR-92a-3p  |
| 1 | SRGN     | hsa-miR-181a-5p |
| 1 | SRP72    | hsa-miR-16-5p   |
| 1 | SRPK1    | hsa-miR-16-5p   |
| 1 | SRSF1    | hsa-miR-377-3p  |
| 1 | SS18     | hsa-miR-197-3p  |
| 1 | SSH2     | hsa-miR-20a-5p  |
| 1 | SSR1     | hsa-miR-30b-3p  |
| 1 | STAMBP   | hsa-miR-221-3p  |
| 1 | STARD7   | hsa-miR-193a-3p |
| 1 | STEAP3   | hsa-miR-16-5p   |
| 1 | STIM1    | hsa-miR-17-3p   |
| 1 | STK17B   | hsa-miR-20a-5p  |
| 1 | STMN1    | hsa-miR-221-3p  |
| 1 | STX17    | hsa-miR-15a-5p  |
| 1 | STX7     | hsa-miR-543     |
| 1 | SUB1     | hsa-miR-16-2-3p |
| 1 | SUCLA2   | hsa-miR-16-5p   |
| 1 | SUCO     | hsa-miR-20a-5p  |
| 1 | SUMO1    | hsa-miR-877-3p  |
| 1 | SURF4    | hsa-miR-34a-5p  |
| 1 | SV2A     | hsa-miR-92a-3p  |
| 1 | SYF2     | hsa-miR-16-5p   |
| 1 | SYNGR2   | hsa-miR-34a-5p  |
| 1 | SYT1     | hsa-miR-34a-5p  |
| 1 | TAF15    | hsa-miR-877-3p  |
| 1 | TANC1    | hsa-miR-20a-5p  |
| 1 | TANC2    | hsa-miR-92a-3p  |
| 1 | TANGO6   | hsa-miR-15b-5p  |
| 1 | TARDBP   | hsa-miR-93-3p   |
| 1 | TBC1D1   | hsa-miR-7-1-3p  |
| 1 | TBC1D15  | hsa-miR-17-5p   |
| 1 | TBL3     | hsa-miR-16-5p   |
| 1 | TCF4     | hsa-miR-20a-5p  |

|   |          |                 |
|---|----------|-----------------|
| 1 | TCFL5    | hsa-miR-16-5p   |
| 1 | TECPR2   | hsa-miR-92a-3p  |
| 1 | TELO2    | hsa-miR-16-5p   |
| 1 | TES      | hsa-let-7b-3p   |
| 1 | TFAM     | hsa-miR-20a-5p  |
| 1 | TFAP4    | hsa-miR-16-5p   |
| 1 | TGFBI    | hsa-miR-16-5p   |
| 1 | TGFBR2   | hsa-miR-20a-5p  |
| 1 | THRA     | hsa-miR-15b-5p  |
| 1 | TIAM1    | hsa-miR-221-3p  |
| 1 | TIMM10B  | hsa-miR-16-5p   |
| 1 | TIMP2    | hsa-miR-106a-5p |
| 1 | TIMP3    | hsa-miR-17-5p   |
| 1 | TIPARP   | hsa-miR-221-3p  |
| 1 | TJP1     | hsa-miR-379-3p  |
| 1 | TMBIM6   | hsa-miR-20a-5p  |
| 1 | TMED4    | hsa-miR-181a-5p |
| 1 | TMED7    | hsa-miR-221-3p  |
| 1 | TMEM154  | hsa-miR-16-5p   |
| 1 | TMEM248  | hsa-miR-221-3p  |
| 1 | TMEM30A  | hsa-miR-181a-5p |
| 1 | TMEM41A  | hsa-miR-16-5p   |
| 1 | TMEM87A  | hsa-miR-16-5p   |
| 1 | TMOD2    | hsa-miR-34a-5p  |
| 1 | TMTC1    | hsa-miR-665     |
| 1 | TMTC3    | hsa-miR-16-5p   |
| 1 | TMX3     | hsa-miR-20a-5p  |
| 1 | TMX4     | hsa-miR-197-3p  |
| 1 | TNFAIP1  | hsa-miR-20a-5p  |
| 1 | TNFRSF1B | hsa-miR-193a-3p |
| 1 | TNFRSF21 | hsa-miR-20a-5p  |
| 1 | TNPO3    | hsa-miR-16-5p   |
| 1 | TNRC18   | hsa-miR-34a-5p  |
| 1 | TOMM20   | hsa-miR-93-3p   |
| 1 | TOMM34   | hsa-miR-16-5p   |
| 1 | TOPORS   | hsa-miR-20a-5p  |
| 1 | TOR4A    | hsa-miR-16-5p   |
| 1 | TP53     | hsa-miR-34a-5p  |
| 1 | TPD52    | hsa-miR-34a-5p  |
| 1 | TPGS1    | hsa-miR-766-3p  |
| 1 | TPM3     | hsa-miR-16-5p   |
| 1 | TPPP     | hsa-miR-34a-5p  |
| 1 | TPPP3    | hsa-miR-16-5p   |
| 1 | TRABD    | hsa-miR-17-3p   |
| 1 | TRAF4    | hsa-miR-16-5p   |
| 1 | TRAPPC2  | hsa-miR-92a-3p  |
| 1 | TRIB1    | hsa-miR-877-3p  |
| 1 | TRIM2    | hsa-miR-493-5p  |
| 1 | TRIM25   | hsa-miR-877-3p  |
| 1 | TRIM44   | hsa-miR-16-5p   |
| 1 | TRPS1    | hsa-miR-221-3p  |
| 1 | TRUB1    | hsa-miR-15a-3p  |

|   |         |                |
|---|---------|----------------|
| 1 | TSPAN13 | hsa-miR-221-3p |
| 1 | TSPYL1  | hsa-miR-877-3p |
| 1 | TSR1    | hsa-miR-16-5p  |
| 1 | TTC17   | hsa-miR-16-5p  |
| 1 | TTC33   | hsa-let-7b-3p  |
| 1 | TTL     | hsa-miR-877-3p |
| 1 | TTL12   | hsa-miR-16-5p  |
| 1 | TTPAL   | hsa-miR-20a-5p |
| 1 | TTYH3   | hsa-miR-7-1-3p |
| 1 | TUB     | hsa-miR-221-3p |
| 1 | TUBGCP2 | hsa-miR-16-5p  |
| 1 | TUBGCP3 | hsa-miR-483-3p |
| 1 | TXN2    | hsa-miR-16-5p  |
| 1 | TXNIP   | hsa-miR-34a-5p |
| 1 | TXNRD2  | hsa-miR-17-3p  |
| 1 | TYMS    | hsa-miR-34a-5p |
| 1 | UBAP2   | hsa-miR-34a-5p |
| 1 | UBC     | hsa-miR-20a-5p |
| 1 | UBE2G1  | hsa-miR-17-3p  |
| 1 | UBE2H   | hsa-miR-17-3p  |
| 1 | UBE2V1  | hsa-miR-16-5p  |
| 1 | UBE4A   | hsa-miR-16-5p  |
| 1 | UBP1    | hsa-miR-34a-5p |
| 1 | UBXN2A  | hsa-miR-20a-5p |
| 1 | UBXN2B  | hsa-miR-34a-5p |
| 1 | UBXN7   | hsa-miR-877-3p |
| 1 | UEVLD   | hsa-miR-20a-5p |
| 1 | UFC1    | hsa-miR-16-5p  |
| 1 | UGT8    | hsa-miR-16-5p  |
| 1 | ULBP2   | hsa-miR-34a-5p |
| 1 | UNG     | hsa-miR-16-5p  |
| 1 | UNK     | hsa-miR-17-3p  |
| 1 | UPF2    | hsa-miR-92a-3p |
| 1 | USP28   | hsa-miR-221-3p |
| 1 | USP47   | hsa-miR-34a-5p |
| 1 | UTP15   | hsa-miR-16-5p  |
| 1 | UTP20   | hsa-miR-16-5p  |
| 1 | VAMP2   | hsa-miR-34a-5p |
| 1 | VAMP8   | hsa-miR-16-5p  |
| 1 | VASN    | hsa-miR-34a-5p |
| 1 | VBP1    | hsa-miR-92a-3p |
| 1 | VCAM1   | hsa-miR-126-3p |
| 1 | VCL     | hsa-miR-34a-5p |
| 1 | VCPIP1  | hsa-miR-92a-3p |
| 1 | VEZF1   | hsa-miR-20a-5p |
| 1 | VIM     | hsa-miR-17-3p  |
| 1 | VLDLR   | hsa-miR-409-5p |
| 1 | VMA21   | hsa-miR-16-5p  |
| 1 | VMP1    | hsa-miR-16-5p  |
| 1 | VPS13A  | hsa-miR-15b-5p |
| 1 | VPS33B  | hsa-miR-16-5p  |
| 1 | VPS37B  | hsa-miR-34a-5p |

|   |         |                 |
|---|---------|-----------------|
| 1 | VTI1B   | hsa-miR-16-5p   |
| 1 | WAC     | hsa-miR-20a-5p  |
| 1 | WBP11   | hsa-miR-16-5p   |
| 1 | WDR26   | hsa-miR-92a-3p  |
| 1 | WDR43   | hsa-miR-16-5p   |
| 1 | XKR8    | hsa-miR-16-5p   |
| 1 | XPNPEP3 | hsa-miR-16-5p   |
| 1 | XPO6    | hsa-miR-16-5p   |
| 1 | XPO7    | hsa-miR-16-5p   |
| 1 | XPOT    | hsa-miR-16-5p   |
| 1 | YARS    | hsa-miR-877-3p  |
| 1 | YARS2   | hsa-miR-16-5p   |
| 1 | YBX1    | hsa-miR-34a-5p  |
| 1 | YIPF4   | hsa-miR-16-5p   |
| 1 | YIPF5   | hsa-miR-92a-3p  |
| 1 | YWHAE   | hsa-miR-32-3p   |
| 1 | YY1     | hsa-miR-34a-5p  |
| 1 | ZBTB2   | hsa-miR-16-5p   |
| 1 | ZBTB47  | hsa-miR-106a-5p |
| 1 | ZBTB6   | hsa-miR-20a-5p  |
| 1 | ZBTB9   | hsa-miR-20a-5p  |
| 1 | ZC3H4   | hsa-miR-34a-5p  |
| 1 | ZC3HAV1 | hsa-miR-92a-3p  |
| 1 | ZCCHC24 | hsa-miR-30b-3p  |
| 1 | ZDHHC16 | hsa-miR-34a-5p  |
| 1 | ZDHHC21 | hsa-miR-25-3p   |
| 1 | ZDHHC7  | hsa-miR-877-3p  |
| 1 | ZKSCAN8 | hsa-miR-221-3p  |
| 1 | ZMIZ1   | hsa-miR-493-5p  |
| 1 | ZNF100  | hsa-miR-766-3p  |
| 1 | ZNF12   | hsa-miR-181a-5p |
| 1 | ZNF134  | hsa-miR-25-3p   |
| 1 | ZNF207  | hsa-miR-16-5p   |
| 1 | ZNF217  | hsa-miR-15b-5p  |
| 1 | ZNF275  | hsa-miR-221-3p  |
| 1 | ZNF280C | hsa-miR-16-5p   |
| 1 | ZNF281  | hsa-miR-136-5p  |
| 1 | ZNF292  | hsa-miR-32-3p   |
| 1 | ZNF302  | hsa-miR-197-3p  |
| 1 | ZNF354B | hsa-miR-92a-3p  |
| 1 | ZNF430  | hsa-miR-92a-3p  |
| 1 | ZNF431  | hsa-miR-16-2-3p |
| 1 | ZNF440  | hsa-miR-181a-5p |
| 1 | ZNF503  | hsa-miR-92a-3p  |
| 1 | ZNF507  | hsa-miR-92a-3p  |
| 1 | ZNF594  | hsa-miR-181a-5p |
| 1 | ZNF598  | hsa-miR-92a-3p  |
| 1 | ZNF623  | hsa-miR-34a-5p  |
| 1 | ZNF629  | hsa-miR-877-3p  |
| 1 | ZNF652  | hsa-miR-221-3p  |
| 1 | ZNF706  | hsa-miR-20a-5p  |
| 1 | ZNF721  | hsa-miR-92a-3p  |

|   |        |                |
|---|--------|----------------|
| 1 | ZNF732 | hsa-miR-766-3p |
| 1 | ZNF785 | hsa-miR-92a-3p |
| 1 | ZNF792 | hsa-miR-7-1-3p |
| 1 | ZNF800 | hsa-miR-20a-5p |
| 1 | ZNF827 | hsa-miR-16-5p  |
| 1 | ZRANB1 | hsa-miR-20a-5p |
| 1 | ZYG11B | hsa-miR-197-3p |
| 1 | ZYX    | hsa-miR-16-5p  |
